# Supplementary material for: Chlorinated metabolites with antibacterial activities from a deep-sea-derived Spiromastix fungus
Source: Royal Society of Chemistry journal article supplement (doi:10.1039/d1ra05736g), 2021-01-01
Supplement: d1ra05736g1.pdf [file d1ra05736g1.pdf]

# Supporting Information

**Chlorinated metabolites with antibacterial activities from a deep-sea-derived  
*Spiromastix* fungus**

## List of contents

- Figure S1-1.** HRESIMS spectrum of compound **1**.
- Figure S1-2.**  $^1\text{H}$  NMR spectrum of compound **1** in  $\text{DMSO-}d_6$  (400 MHz).
- Figure S1-3.** APT spectrum of compound **1** in  $\text{DMSO-}d_6$  (100 MHz).
- Figure S1-4.** HSQC spectrum of compound **1** in  $\text{DMSO-}d_6$ .
- Figure S1-5.**  $^1\text{H-}^1\text{H}$  COSY spectrum of compound **1** in  $\text{DMSO-}d_6$ .
- Figure S1-6.** HMBC spectrum of compound **1** in  $\text{DMSO-}d_6$ .
- Figure S1-7.** NOESY spectrum of compound **1** in  $\text{DMSO-}d_6$ .
- Figure S2-1.** HRESIMS spectrum of compound **2**.
- Figure S2-2.**  $^1\text{H}$  NMR spectrum of compound **2** in  $\text{DMSO-}d_6$  (400 MHz).
- Figure S2-3.** APT spectrum of compound **2** in  $\text{DMSO-}d_6$  (100 MHz).
- Figure S2-4.** HSQC spectrum of compound **2** in  $\text{DMSO-}d_6$ .
- Figure S2-5.**  $^1\text{H-}^1\text{H}$  COSY spectrum of compound **2** in  $\text{DMSO-}d_6$ .
- Figure S2-6.** HMBC spectrum of compound **2** in  $\text{DMSO-}d_6$ .
- Figure S2-7.** NOESY spectrum of compound **2** in  $\text{DMSO-}d_6$ .
- Figure S3-1.** HRESIMS spectrum of compound **3**.
- Figure S3-2.**  $^1\text{H}$  NMR spectrum of compound **3** in  $\text{DMSO-}d_6$  (400 MHz).
- Figure S3-3.** APT spectrum of compound **3** in  $\text{DMSO-}d_6$  (100 MHz).
- Figure S3-4.** HSQC spectrum of compound **3** in  $\text{DMSO-}d_6$ .
- Figure S3-5.**  $^1\text{H-}^1\text{H}$  COSY spectrum of compound **3** in  $\text{DMSO-}d_6$ .
- Figure S3-6.** HMBC spectrum of compound **3** in  $\text{DMSO-}d_6$ .
- Figure S3-7.** NOESY spectrum of compound **3** in  $\text{DMSO-}d_6$ .
- Figure S4-1.** HRESIMS spectrum of compound **4**.
- Figure S4-2.**  $^1\text{H}$  NMR spectrum of compound **4** in  $\text{DMSO-}d_6$  (400 MHz).
- Figure S4-3.** APT spectrum of compound **4** in  $\text{DMSO-}d_6$  (100 MHz).
- Figure S4-4.** HSQC spectrum of compound **4** in  $\text{DMSO-}d_6$ .
- Figure S4-5.**  $^1\text{H-}^1\text{H}$  COSY spectrum of compound **4** in  $\text{DMSO-}d_6$ .
- Figure S4-6.** HMBC spectrum of compound **4** in  $\text{DMSO-}d_6$ .
- Figure S4-7.** NOESY spectrum of compound **4** in  $\text{DMSO-}d_6$ .
- Figure S5-1.** HRESIMS spectrum of compound **5**.

**Figure S5-2.**  $^1\text{H}$  NMR spectrum of compound **5** in  $\text{DMSO-}d_6$  (400 MHz).

**Figure S5-3.** APT spectrum of compound **5** in  $\text{DMSO-}d_6$  (100 MHz).

**Figure S5-4.** HSQC spectrum of compound **5** in  $\text{DMSO-}d_6$ .

**Figure S5-5.**  $^1\text{H-}^1\text{H}$  COSY spectrum of compound **5** in  $\text{DMSO-}d_6$ .

**Figure S5-6.** HMBC spectrum of compound **5** in  $\text{DMSO-}d_6$ .

**Figure S6-1.** HRESIMS spectrum of compound **6**.

**Figure S6-2.**  $^1\text{H}$  NMR spectrum of compound **6** in  $\text{DMSO-}d_6$  (400 MHz).

**Figure S6-3.** APT spectrum of compound **6** in  $\text{DMSO-}d_6$  (100 MHz).

**Figure S6-4.** HSQC spectrum of compound **6** in  $\text{DMSO-}d_6$ .

**Figure S6-5.**  $^1\text{H-}^1\text{H}$  COSY spectrum of compound **6** in  $\text{DMSO-}d_6$ .

**Figure S6-6.** HMBC spectrum of compound **6** in  $\text{DMSO-}d_6$ .

**Figure S7-1.** HRESIMS spectrum of compound **7**.

**Figure S7-2.**  $^1\text{H}$  NMR spectrum of compound **7** in  $\text{DMSO-}d_6$  (400 MHz).

**Figure S7-3.** APT spectrum of compound **7** in  $\text{DMSO-}d_6$  (100 MHz).

**Figure S7-4.** HSQC spectrum of compound **7** in  $\text{DMSO-}d_6$ .

**Figure S7-5.**  $^1\text{H-}^1\text{H}$  COSY spectrum of compound **7** in  $\text{DMSO-}d_6$ .

**Figure S7-6.** HMBC spectrum of compound **7** in  $\text{DMSO-}d_6$ .

**Figure S8-1.** Experimental ECD spectra of **5** and **6** in MeOH

**Figure S8-2.** ECD spectrum of clearanol C (cited from literature)

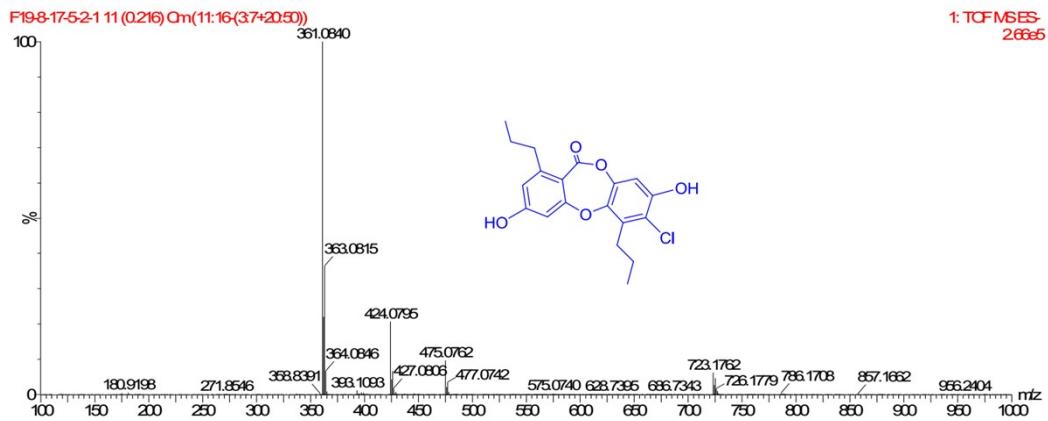

Figure 1-1. HRESIMS spectrum of compound 1.

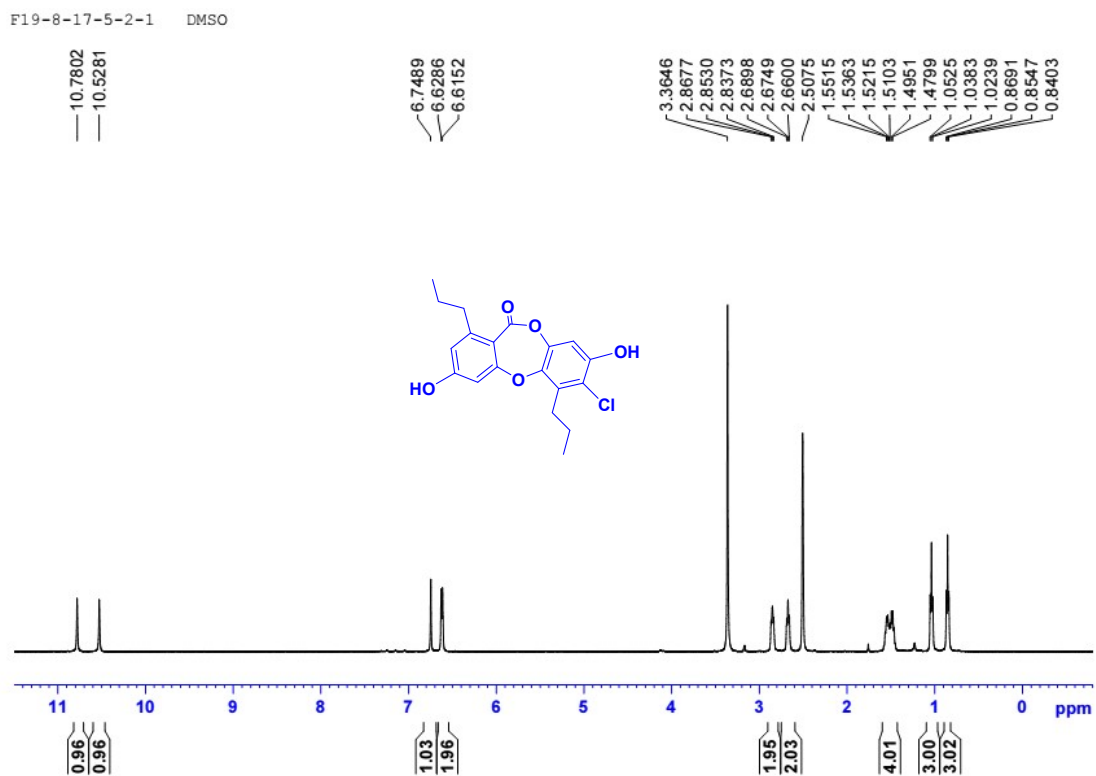

Figure 1-2. <sup>1</sup>H NMR spectrum of compound 1 in DMSO-*d*<sub>6</sub> (400 MHz).

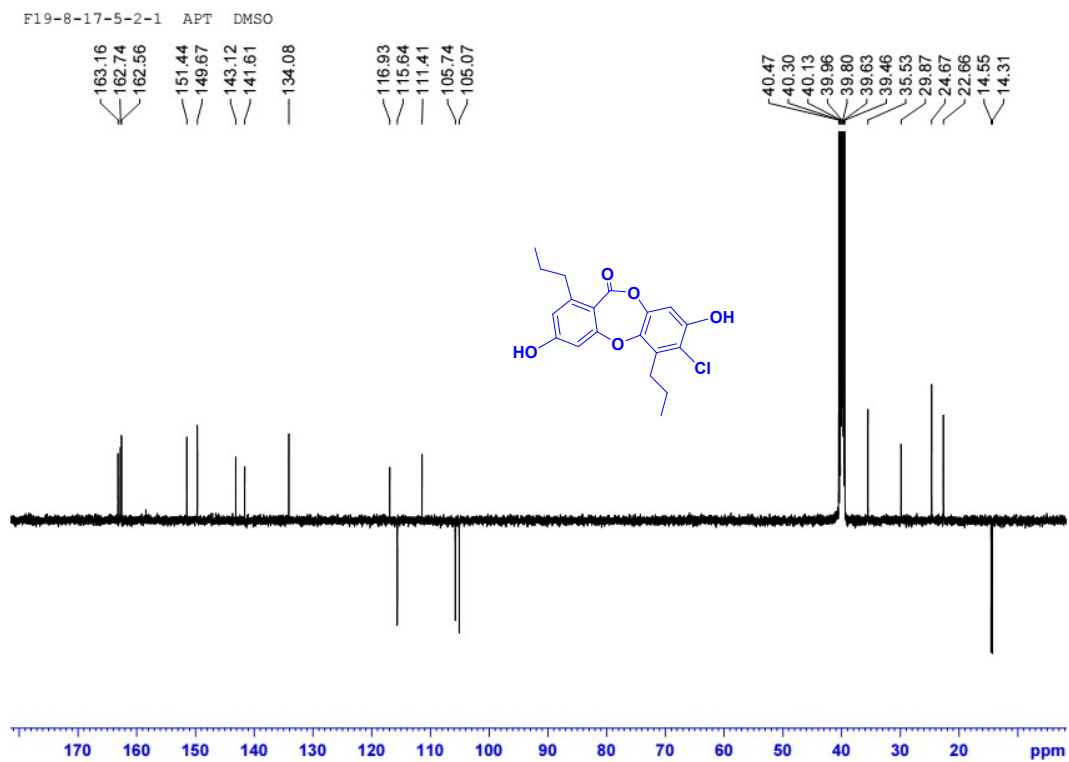

Figure 1-3. APT spectrum of compound 1 in DMSO- $d_6$  (100 MHz).

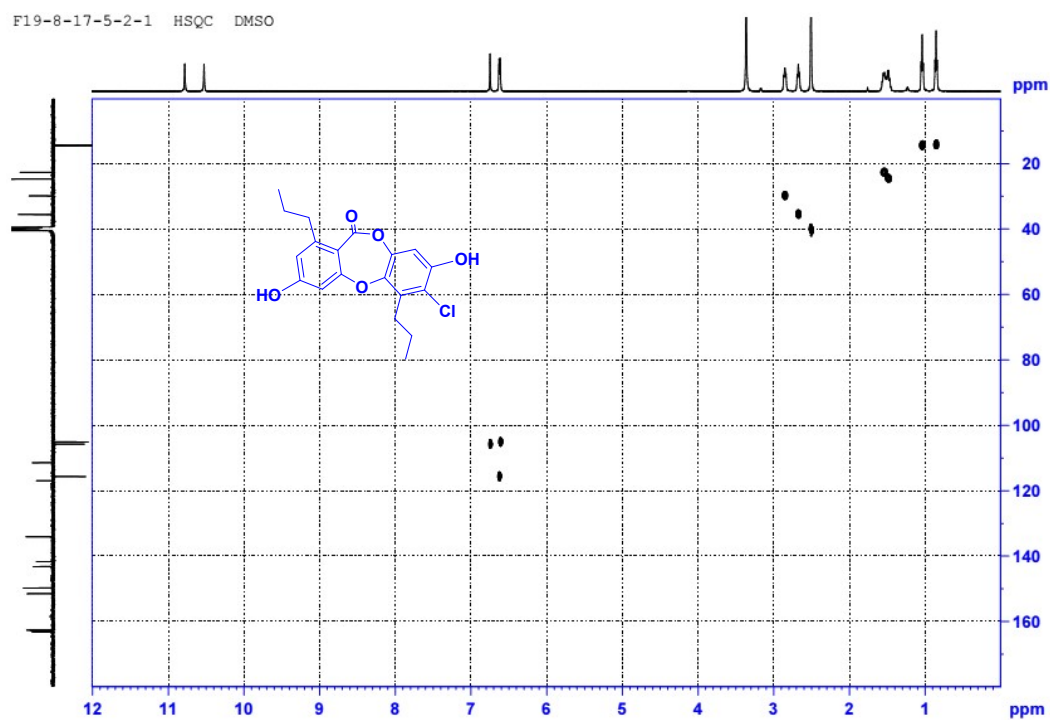

Figure 1-4. HSQC spectrum of compound 1 in DMSO- $d_6$ .

F19-8-17-5-2-1 COSY DMSO

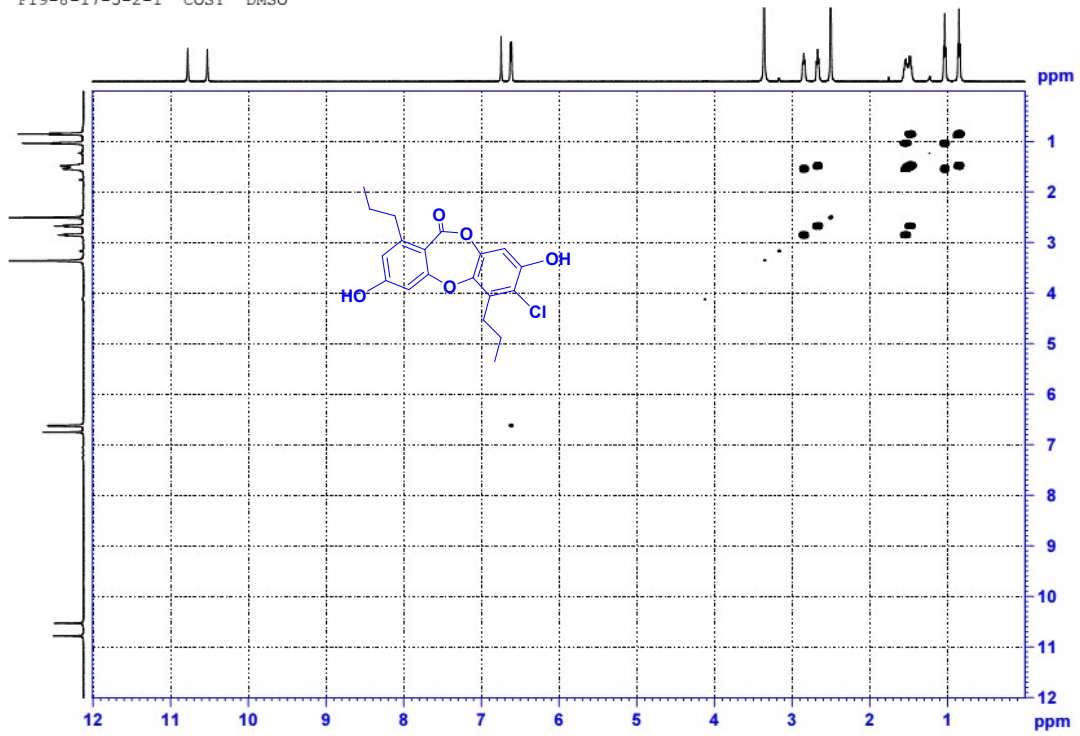

Figure 1-5.  $^1\text{H}$ - $^1\text{H}$  COSY spectrum of compound 1 in  $\text{DMSO-}d_6$ .

F19-8-17-5-2-1 HMBC DMSO

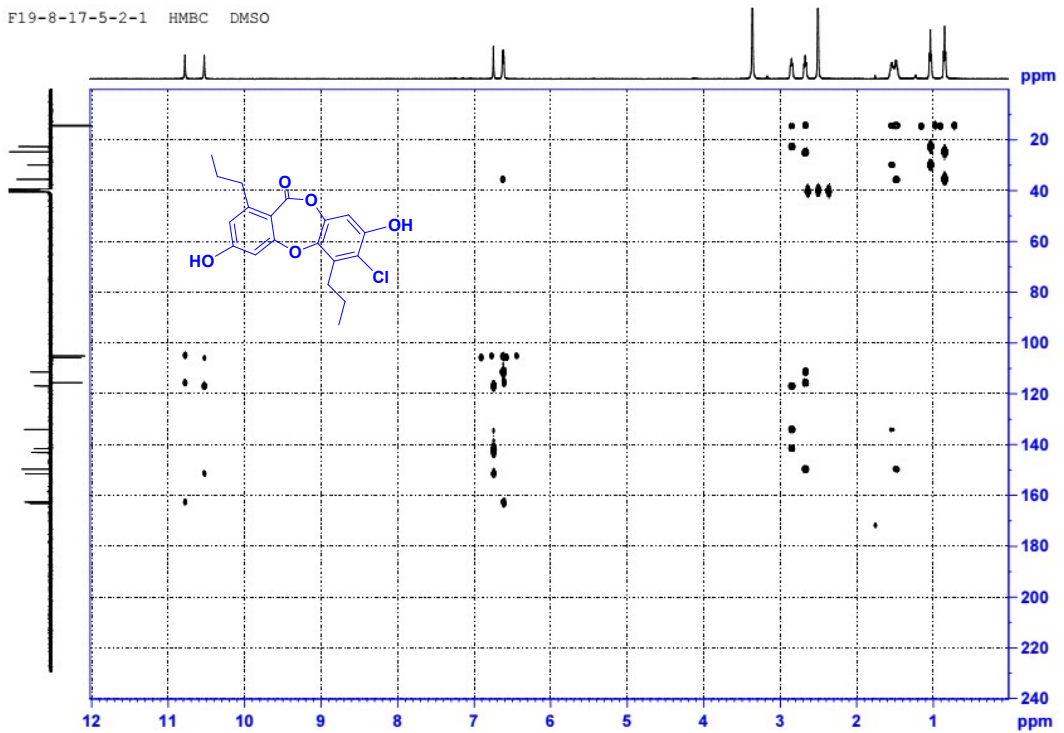

Figure 1-6. HMBC spectrum of compound 1 in  $\text{DMSO-}d_6$ .

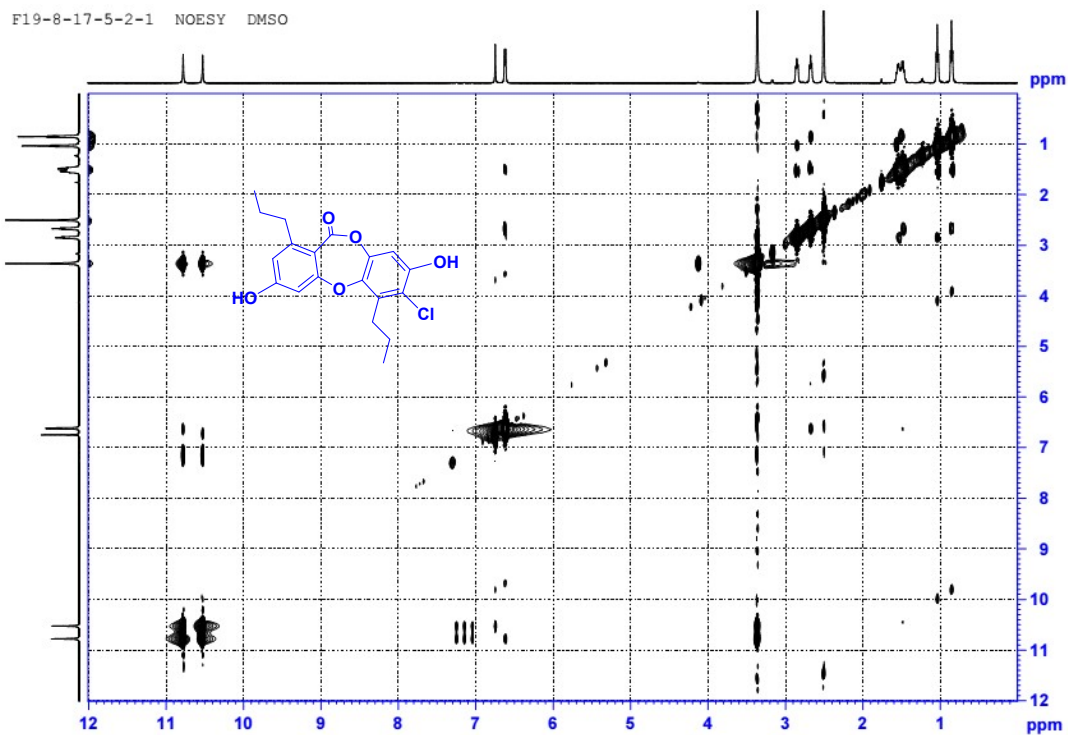

Figure 1-7. NOESY spectrum of compound 1 in DMSO- $d_6$ .

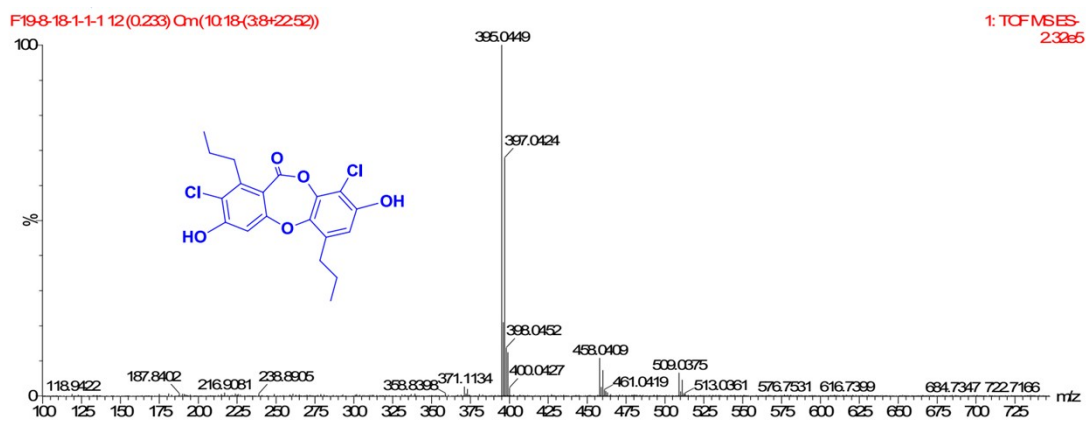

Figure 2-1. HRESIMS spectrum of compound 2.

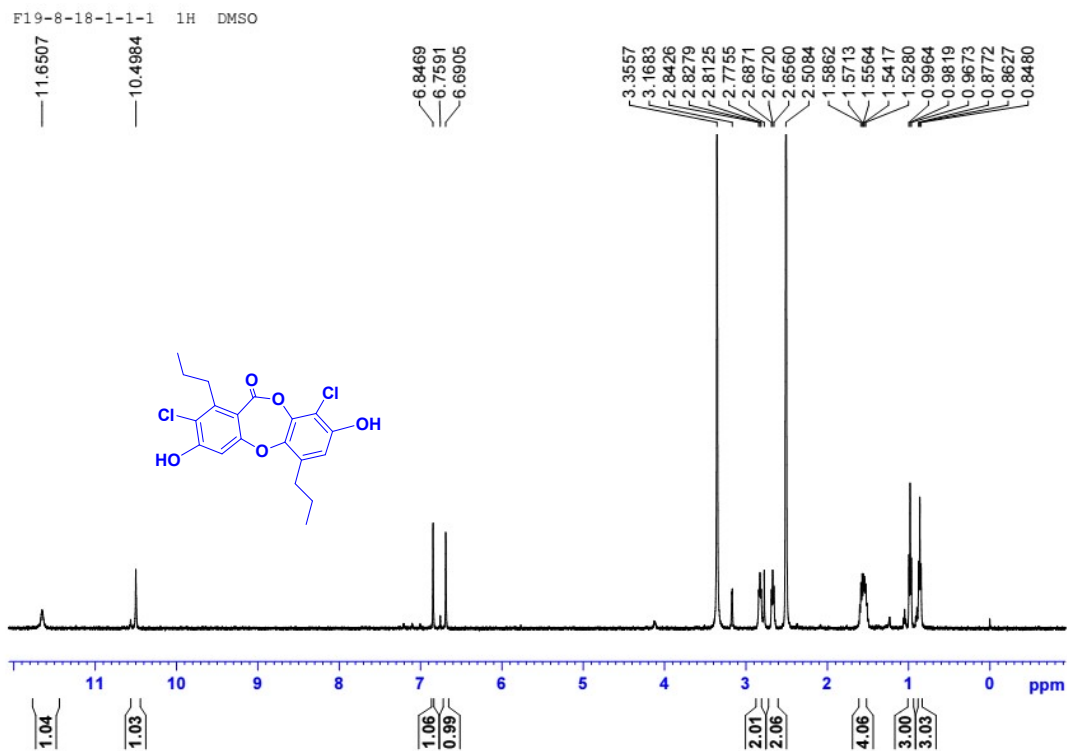

Figure 2-2.  $^1\text{H}$  NMR spectrum of compound 2 in  $\text{DMSO-}d_6$  (400 MHz).

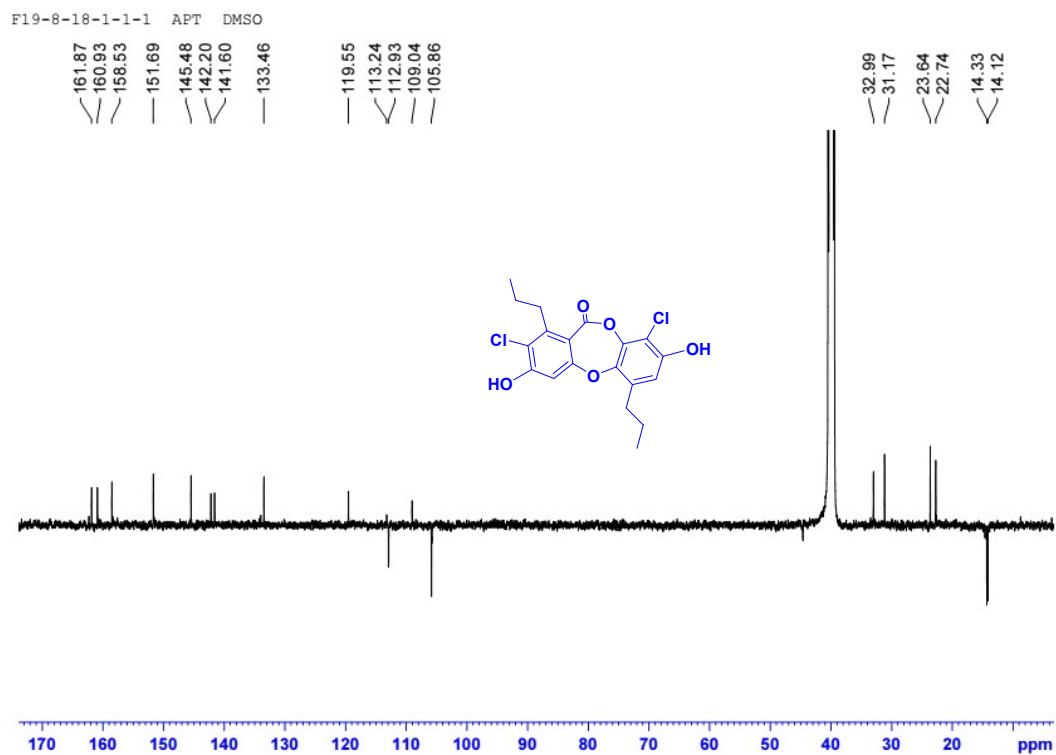

Figure 2-3. APT spectrum of compound 2 in  $\text{DMSO-}d_6$  (100 MHz).



F19-8-18-1-1-1 HSQC DMSO

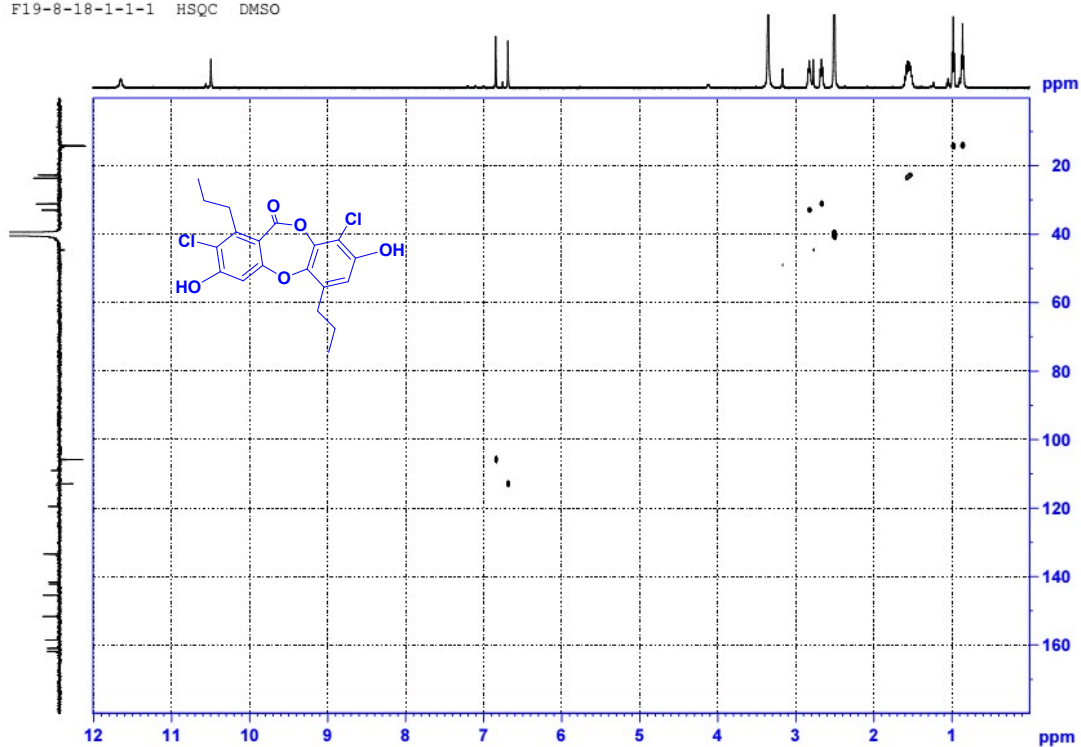

Figure 2-4. HSQC spectrum of compound 2 in DMSO- $d_6$ .

F19-8-18-1-1-1 COSY DMSO

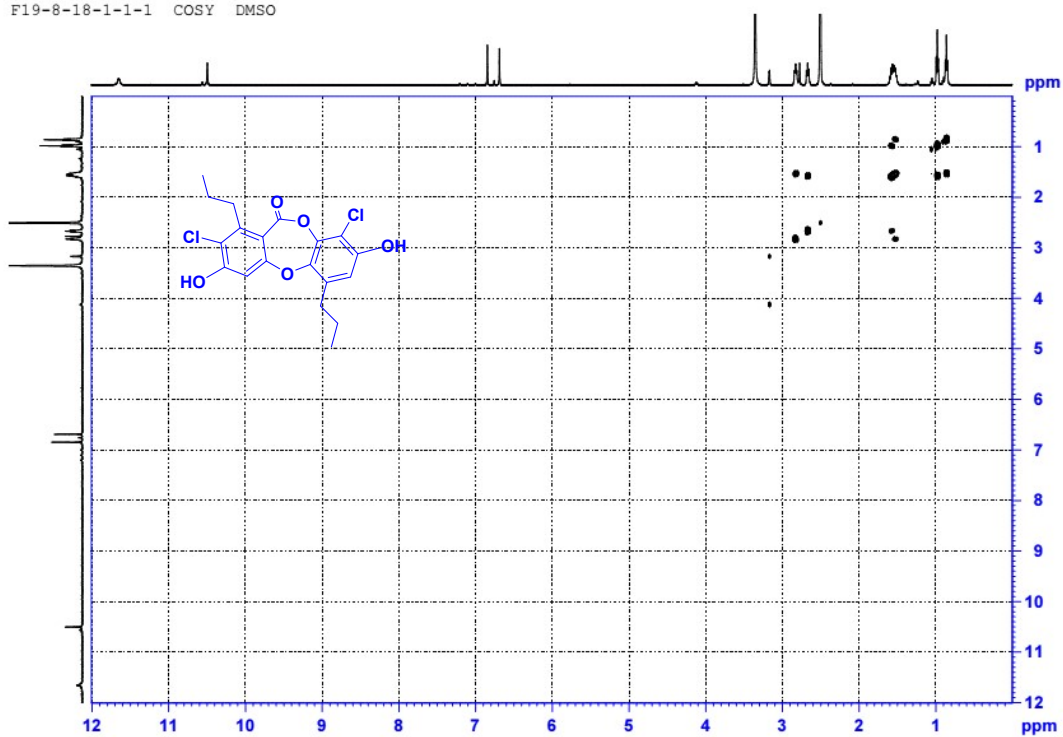

Figure 2-5.  $^1\text{H}$ - $^1\text{H}$  COSY spectrum of compound 2 in DMSO- $d_6$ .

F19-8-18-1-1-1 HMBC DMSO

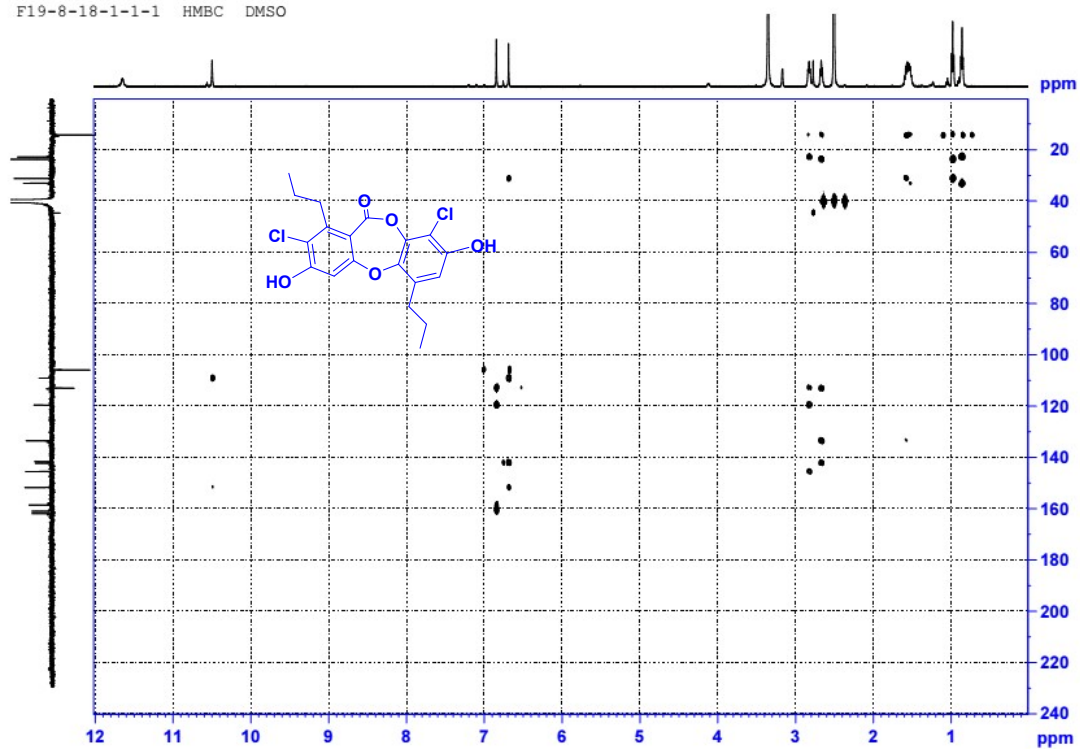

Figure 2-6. HMBC spectrum of compound 2 in DMSO- $d_6$ .

F19-8-18-1-1-1 NOESY DMSO

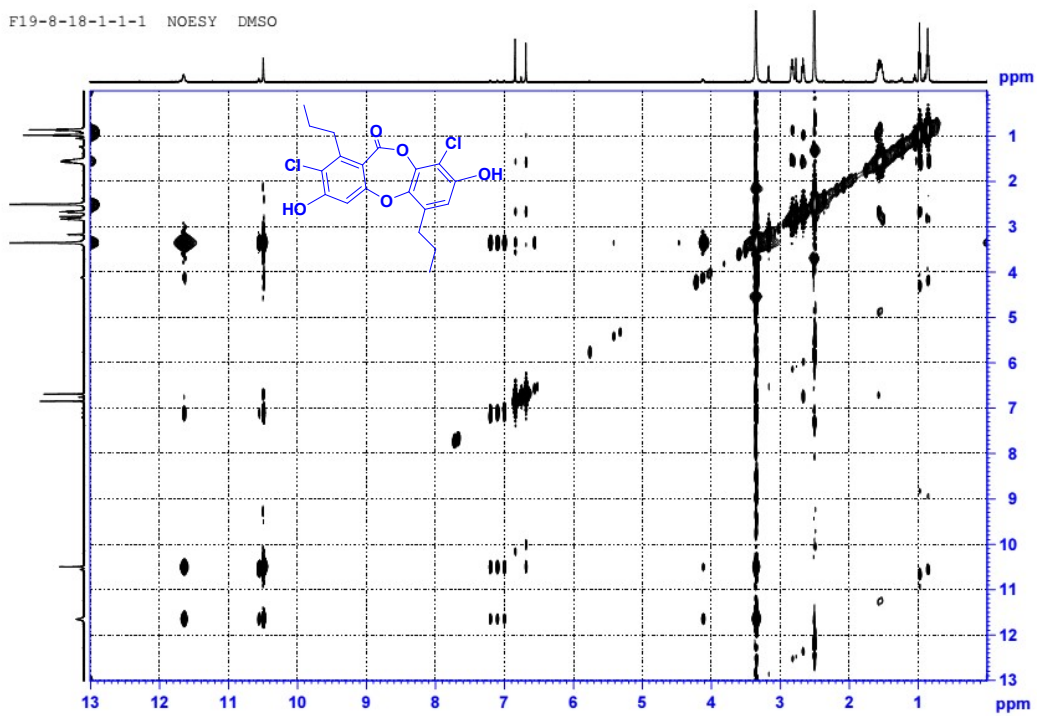

Figure 2-7. NOESY spectrum of compound 2 in DMSO- $d_6$ .

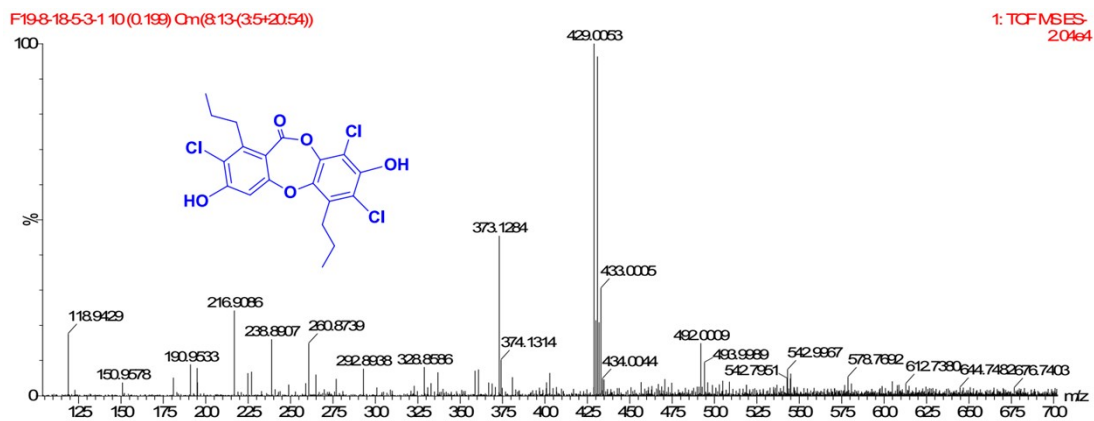

Figure 3-1. HRESIMS spectrum of compound 3.

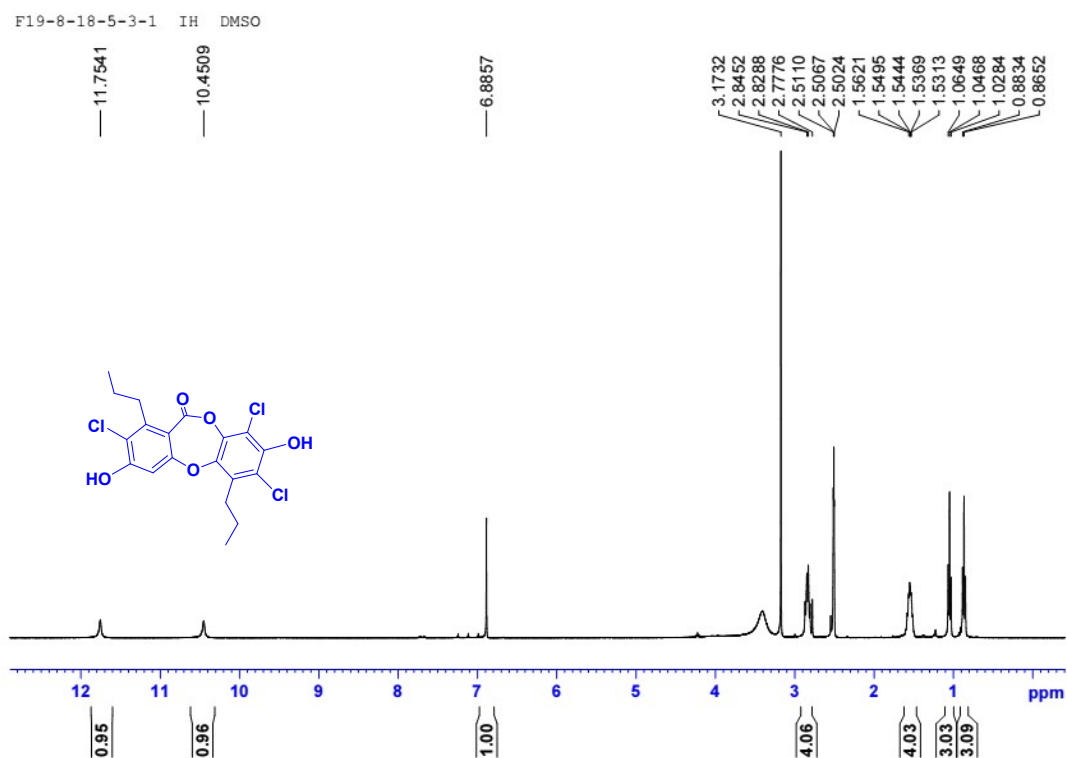

Figure 3-2.  $^1\text{H}$  NMR spectrum of compound 3 in  $\text{DMSO-}d_6$  (400 MHz).

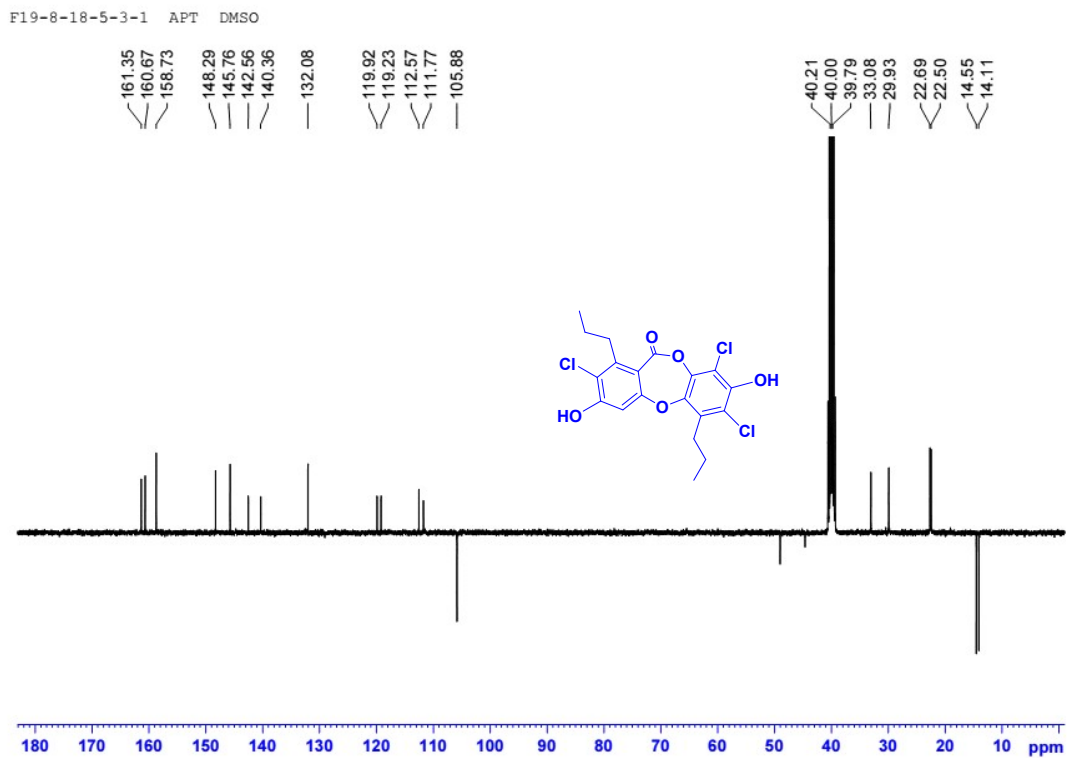

Figure 3-3. APT spectrum of compound 3 in DMSO- $d_6$  (100 MHz).

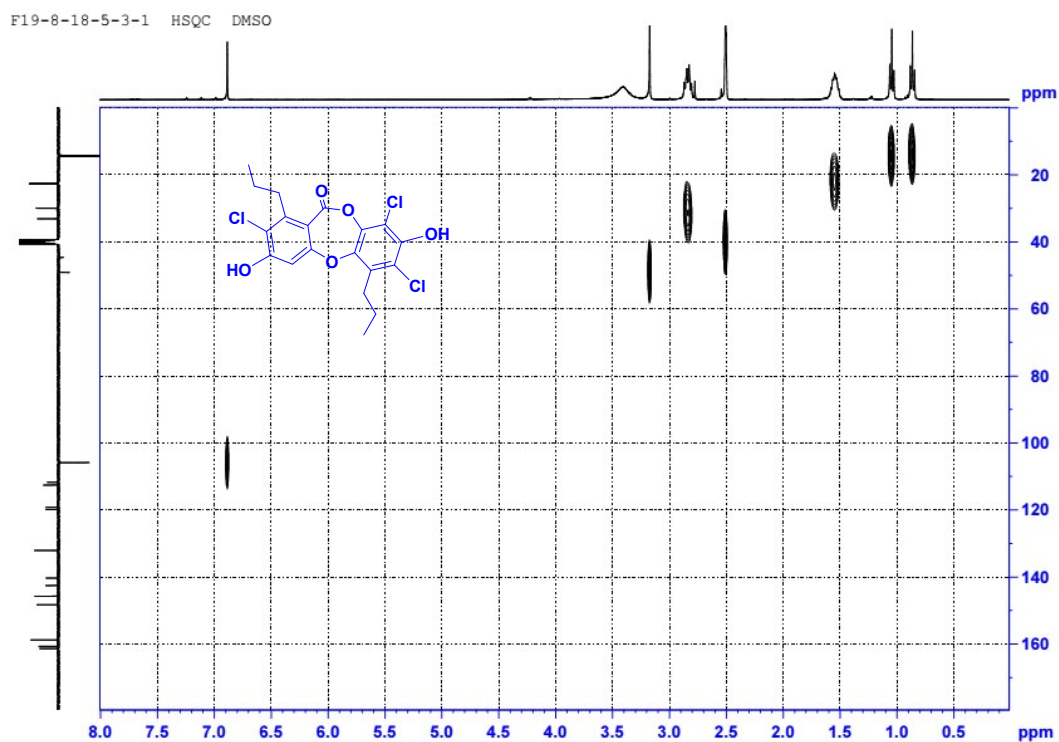

Figure 3-4. HSQC spectrum of compound 3 in DMSO- $d_6$ .

F19-8-18-5-3-1 COSY DMSO

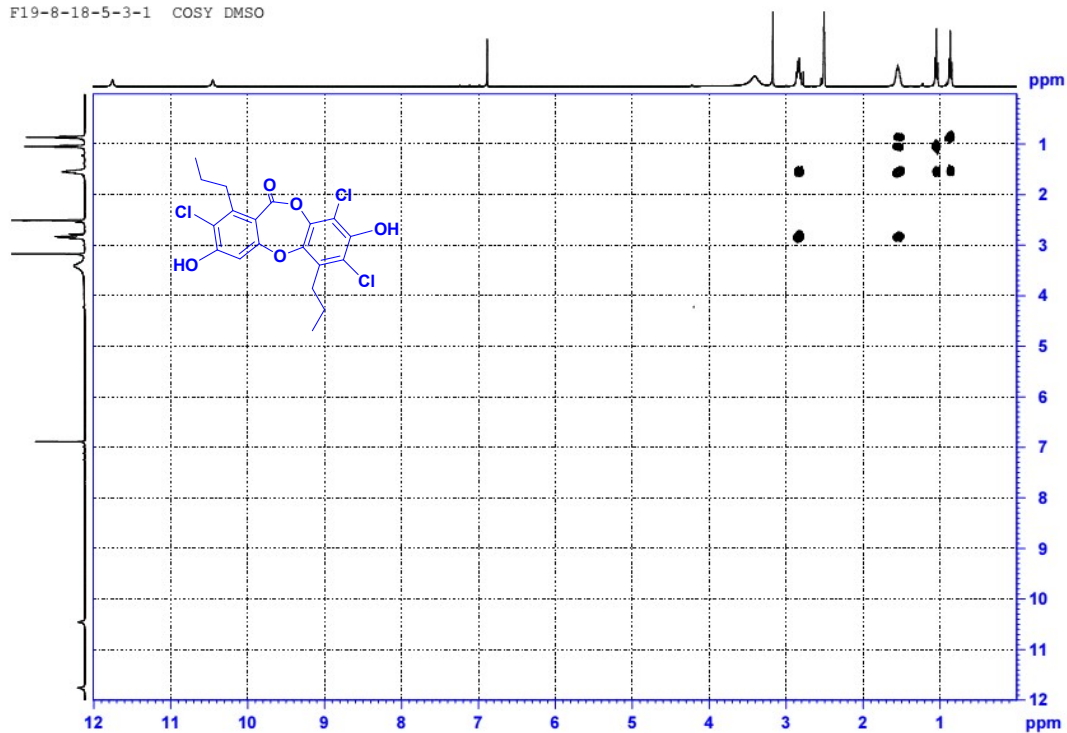

Figure 3-5.  $^1\text{H}$ - $^1\text{H}$  COSY spectrum of compound 3 in  $\text{DMSO-}d_6$ .

F19-8-18-5-3-1 HMBC DMSO

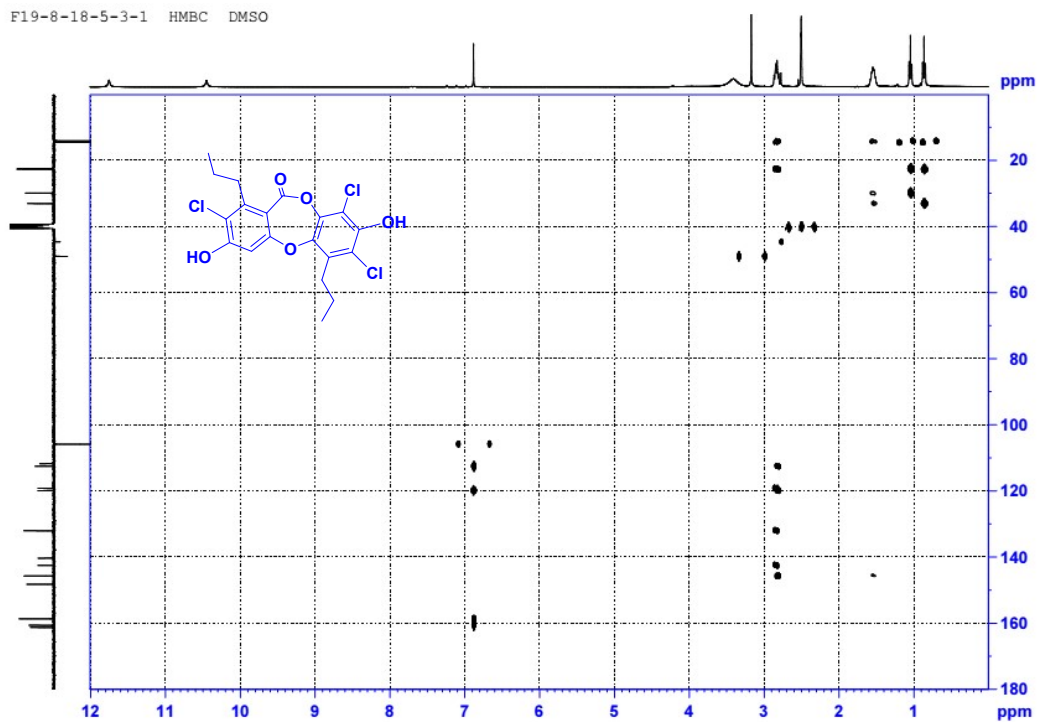

Figure 3-6. HMBC spectrum of compound 3 in  $\text{DMSO-}d_6$ .

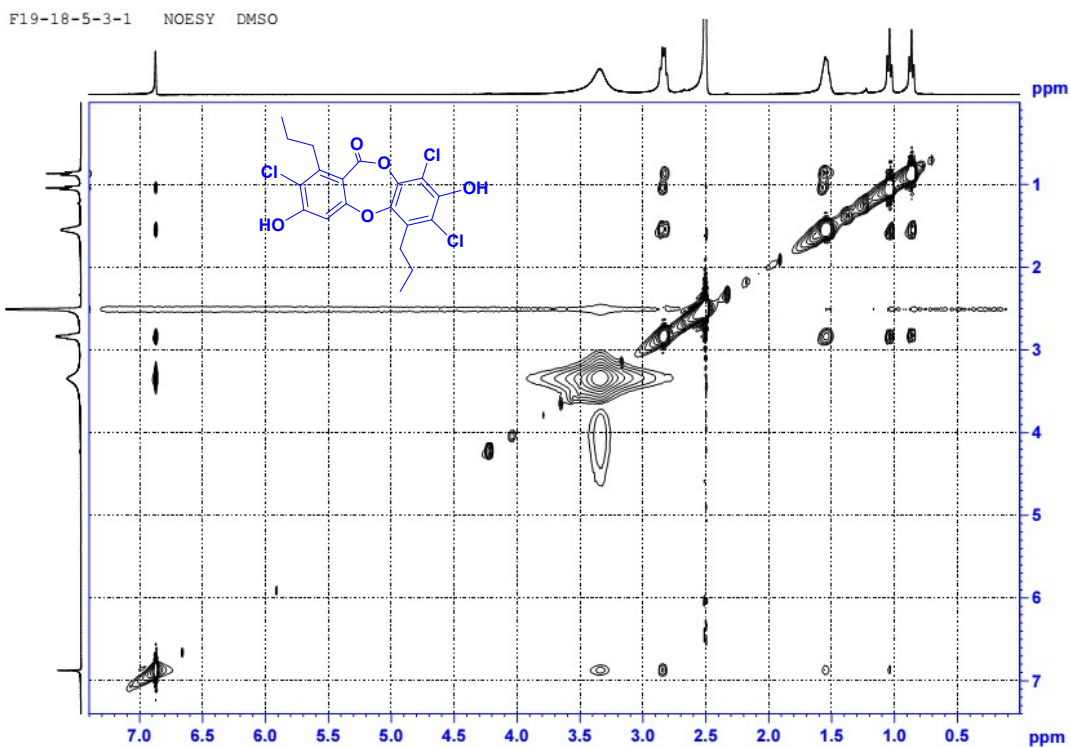

Figure 3-7. NOESY spectrum of compound 3 in DMSO- $d_6$ .

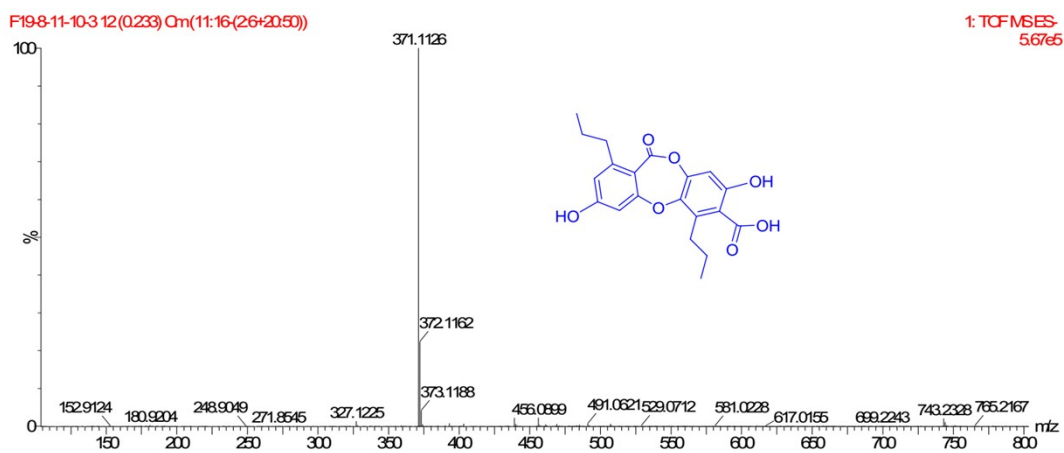

Figure 4-1. HRMSIMS spectrum of compound 4.

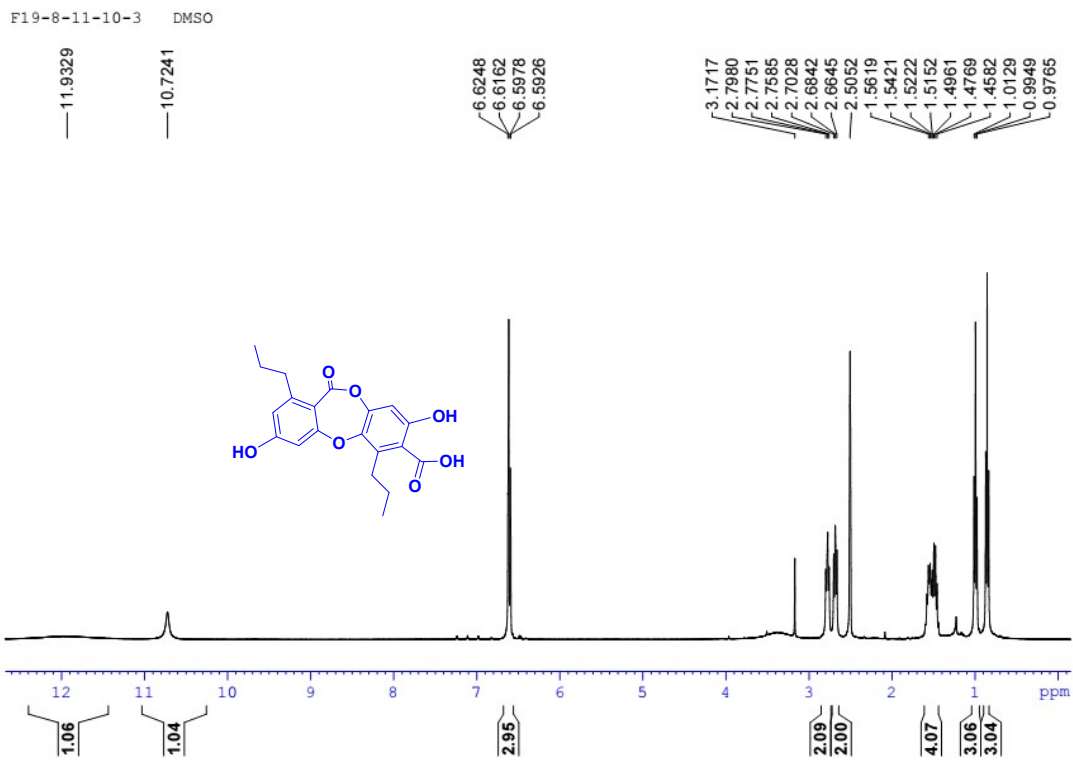

Figure 4-2.  $^1\text{H}$  NMR spectrum of compound 4 in  $\text{DMSO-}d_6$  (400 MHz).

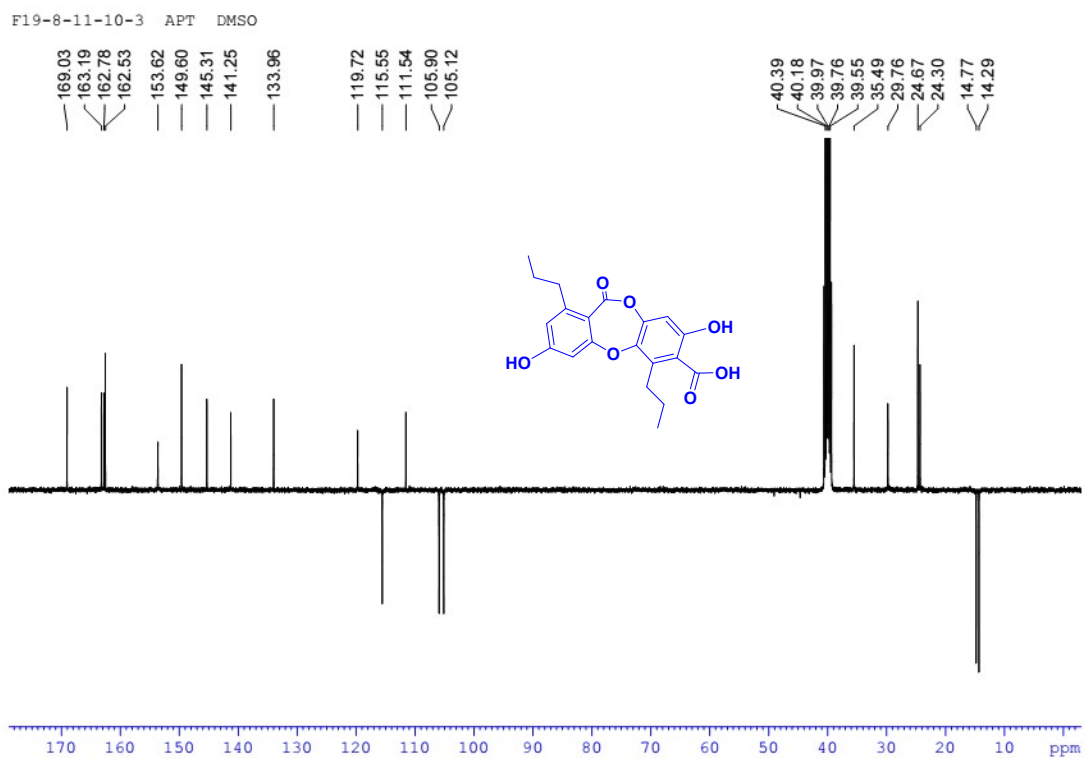

Figure 4-3. APT spectrum of compound 4 in  $\text{DMSO-}d_6$  (100 MHz).

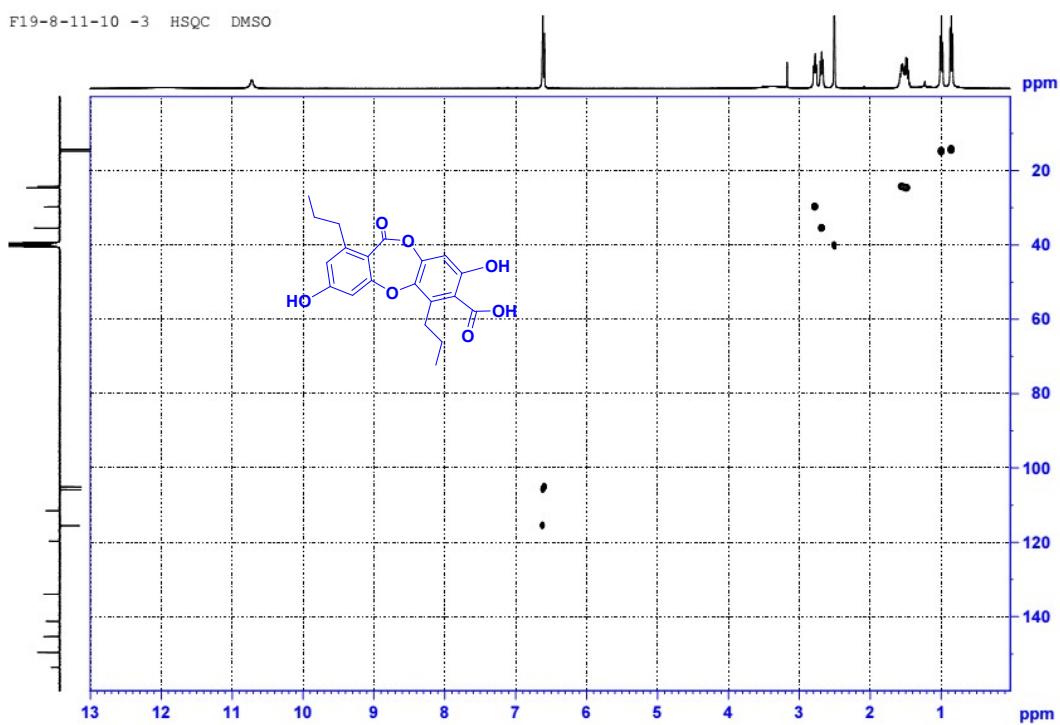

Figure 4-4. HSQC spectrum of compound 4 in DMSO- $d_6$ .

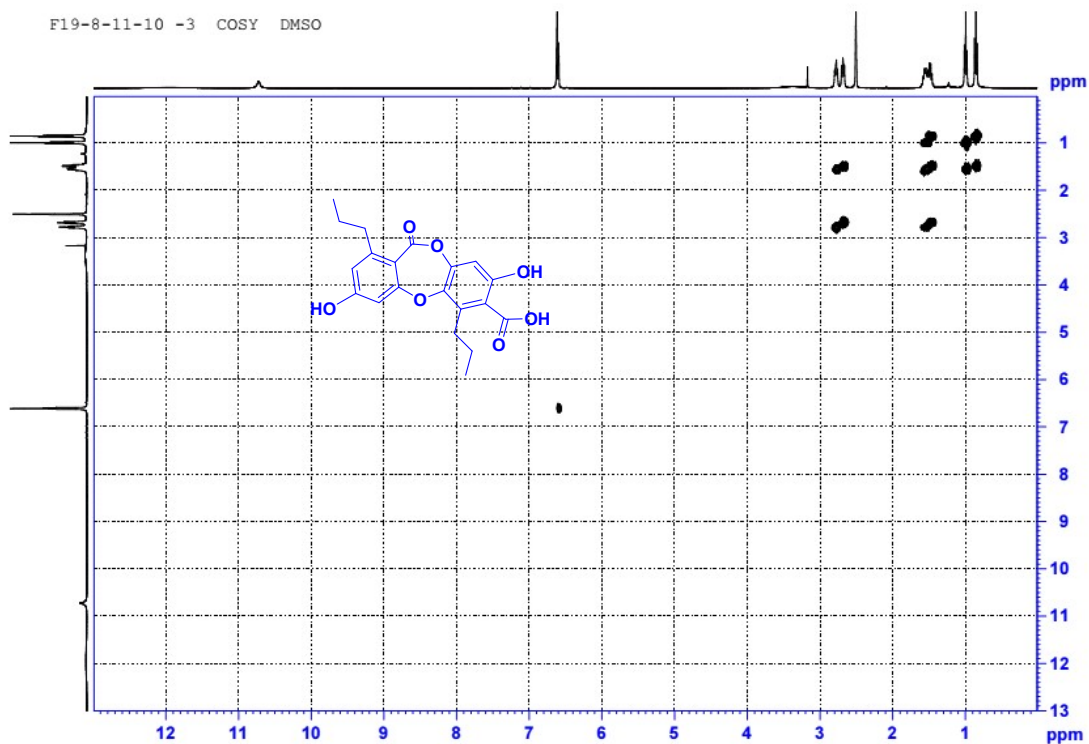

Figure 4-5.  $^1\text{H}$ - $^1\text{H}$  COSY spectrum of compound 4 in DMSO- $d_6$ .



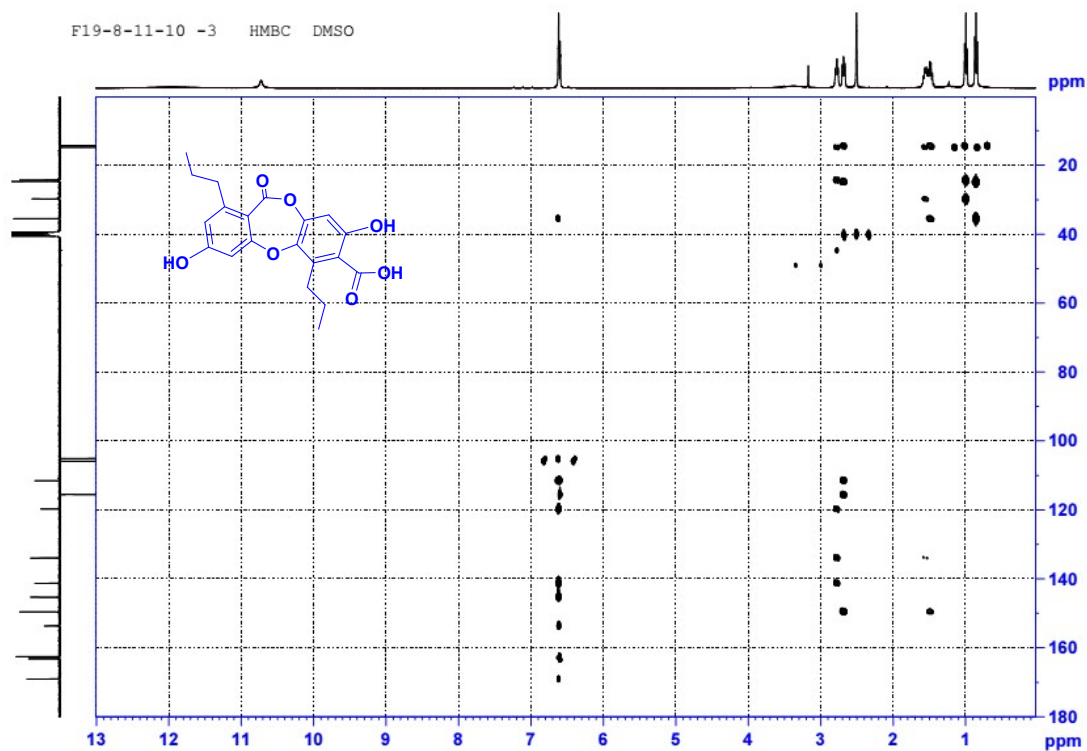

Figure 4-6. HMBC spectrum of compound 4 in DMSO-*d*<sub>6</sub>.

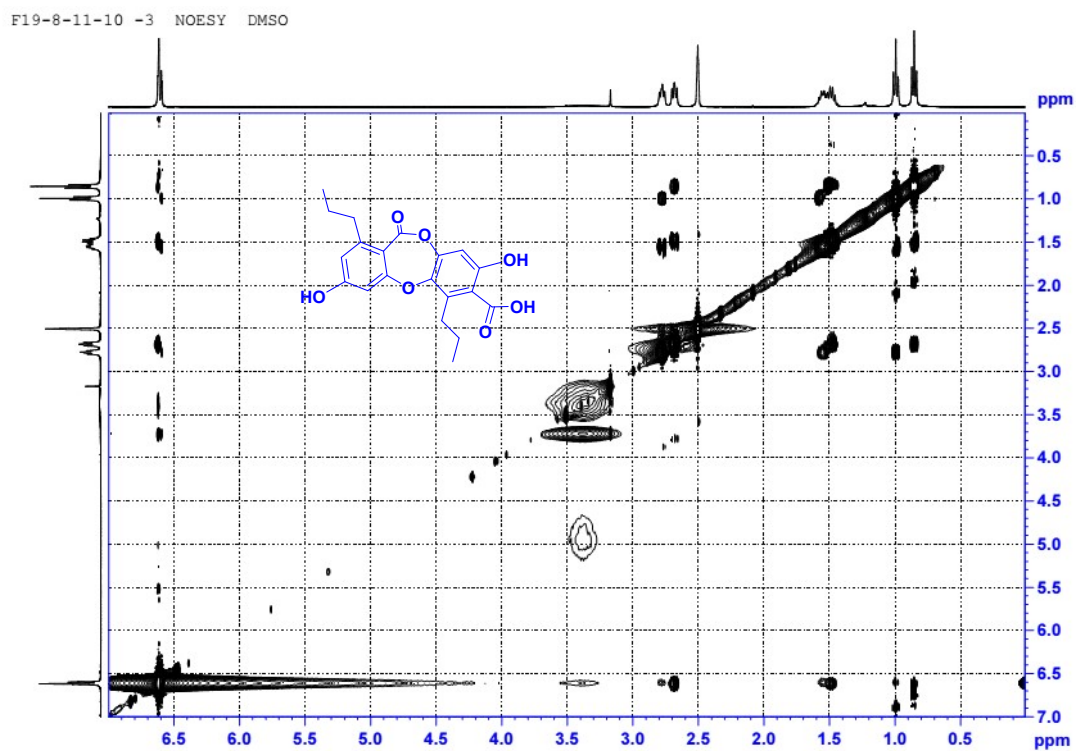

Figure 4-7. NOESY spectrum of compound 4 in DMSO-*d*<sub>6</sub>.

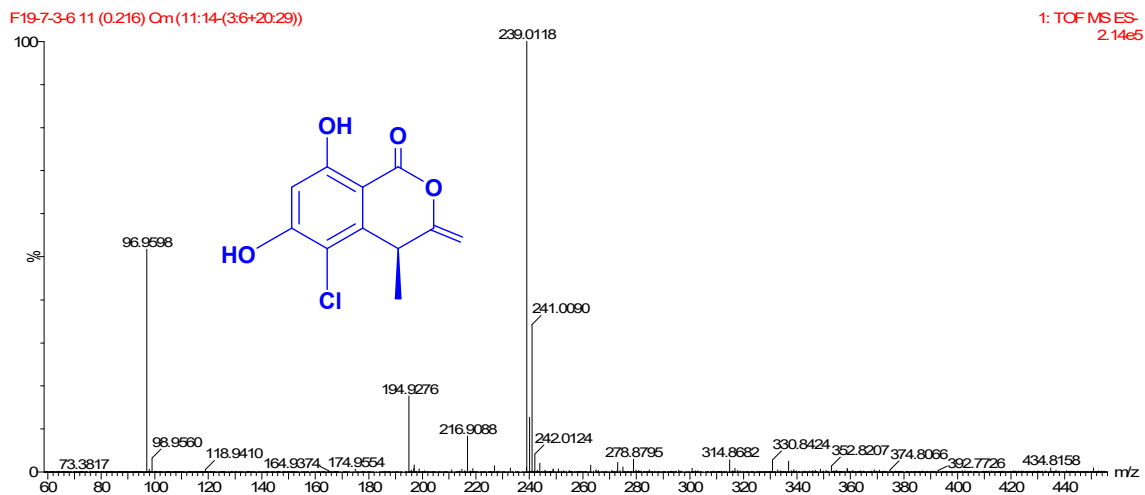

Figure 5-1. HRESIMS spectrum of compound 5.

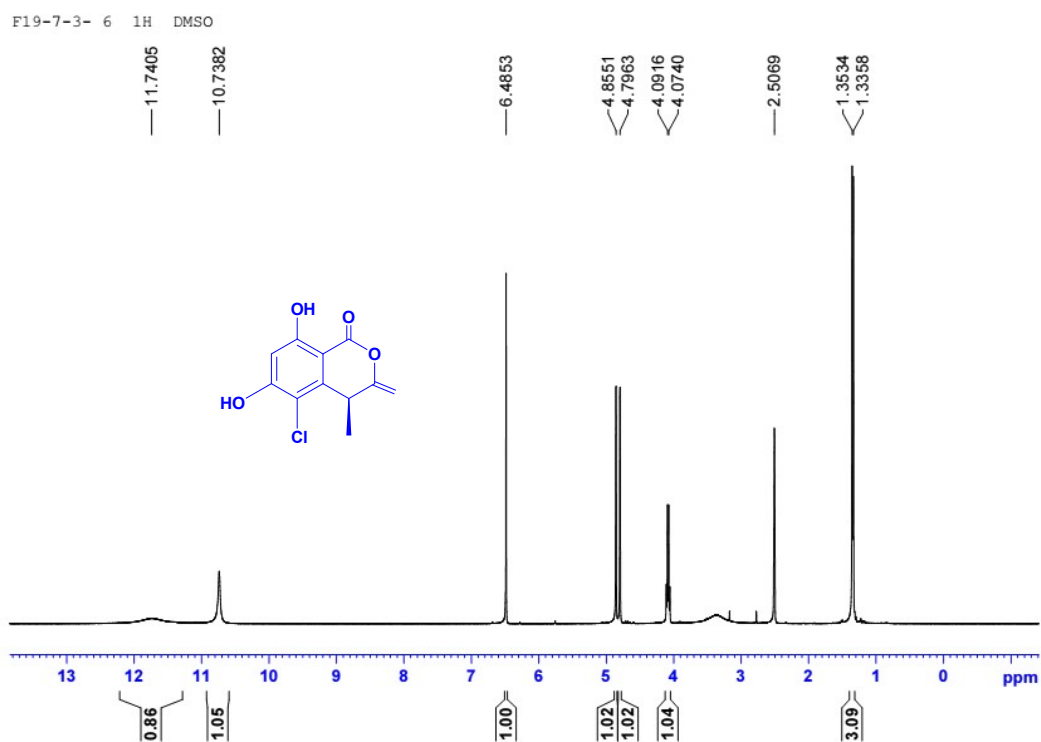

Figure 5-2. <sup>1</sup>H NMR spectrum of compound 5 in DMSO-*d*<sub>6</sub> (400 MHz).

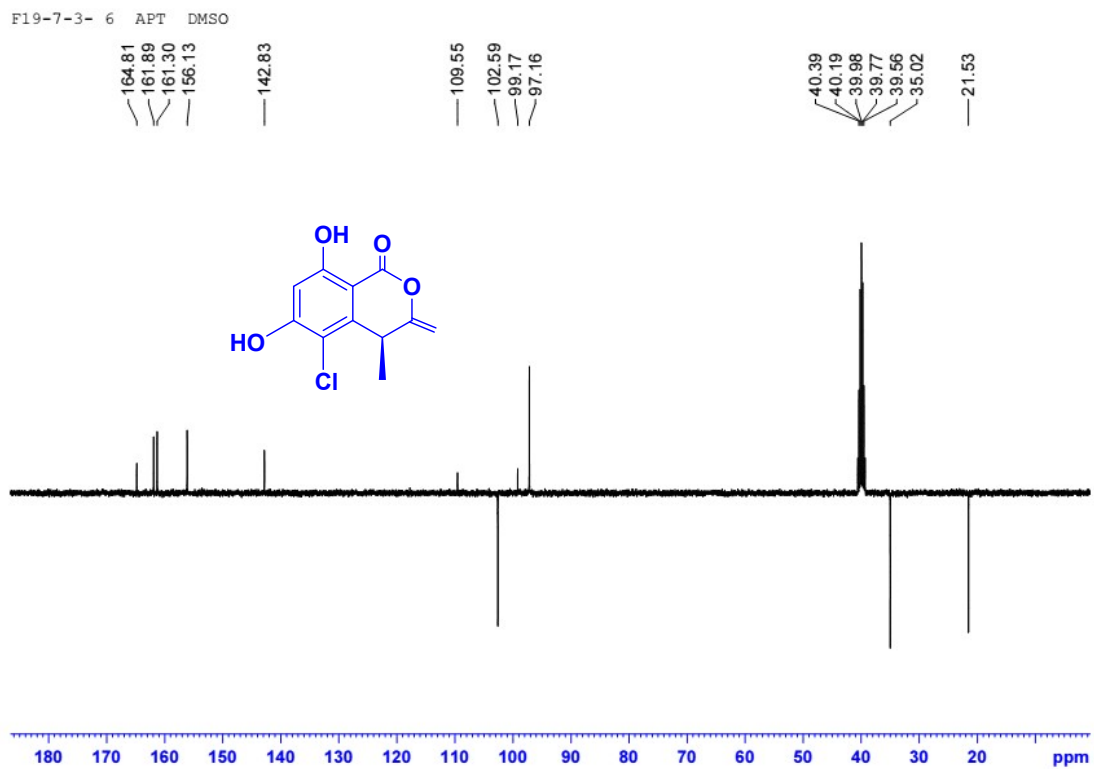

Figure 5-3. APT spectrum of compound 5 in DMSO- $d_6$  (100 MHz).

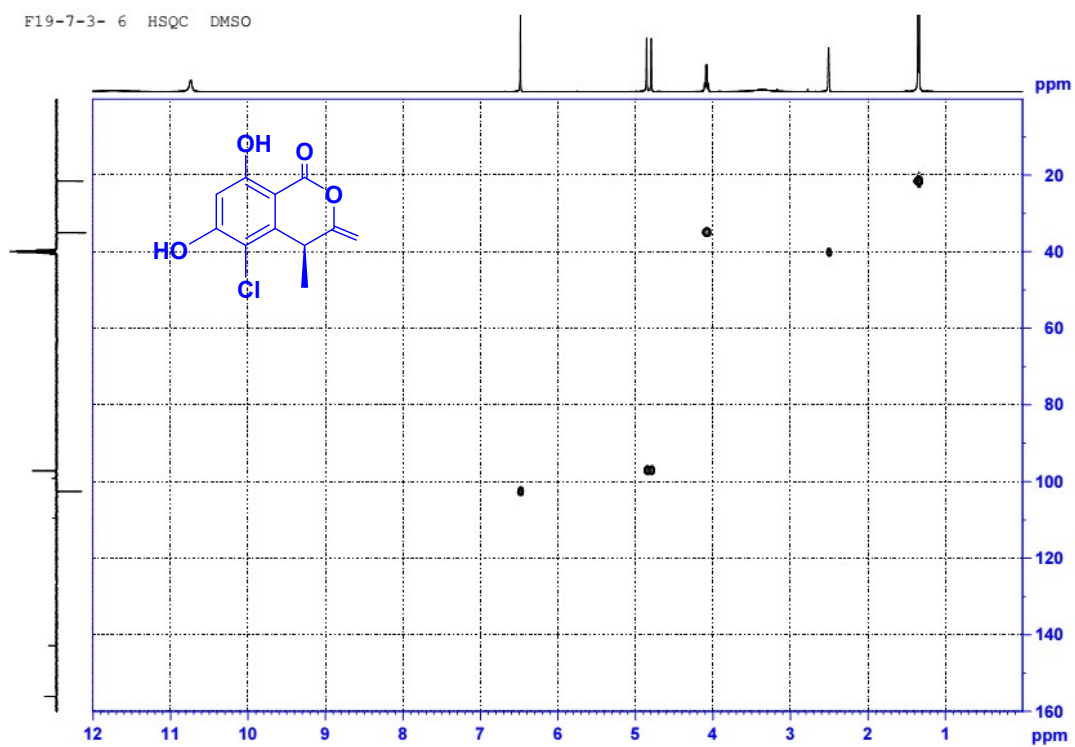

Figure 5-4. HSQC spectrum of compound 5 in DMSO- $d_6$ .

F19-7-3- 6 COSY DMSO

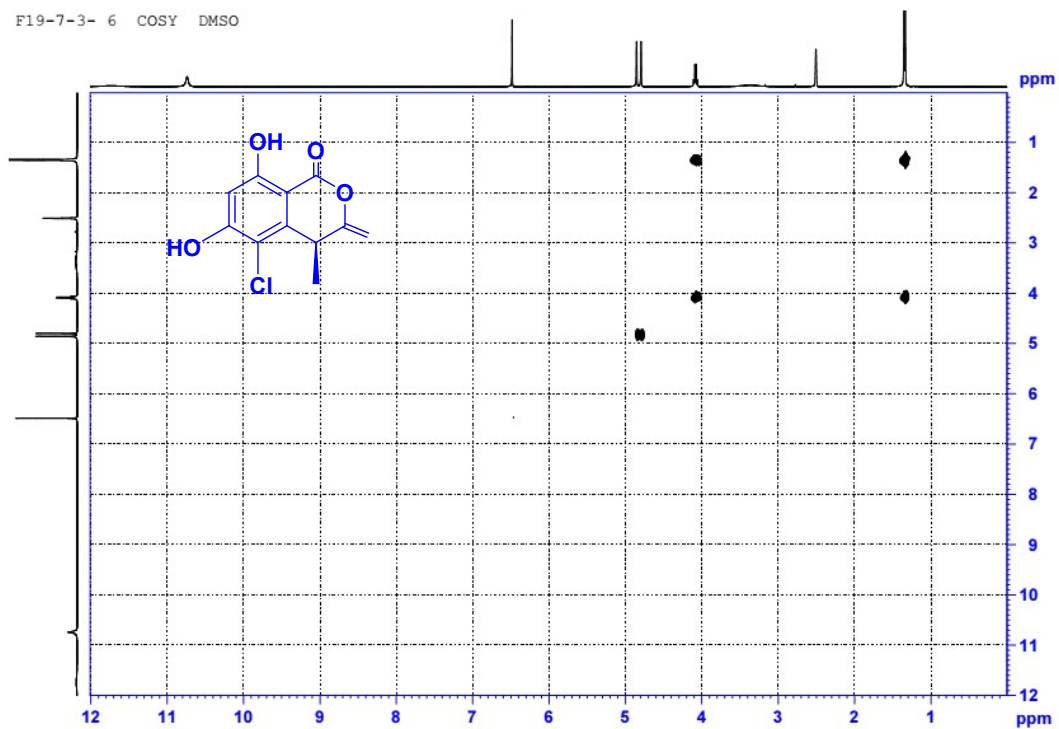

Figure 5-5.  $^1\text{H}$ - $^1\text{H}$  COSY spectrum of compound 5 in  $\text{DMSO-}d_6$ .

F19-7-3- 6 HMBC DMSO

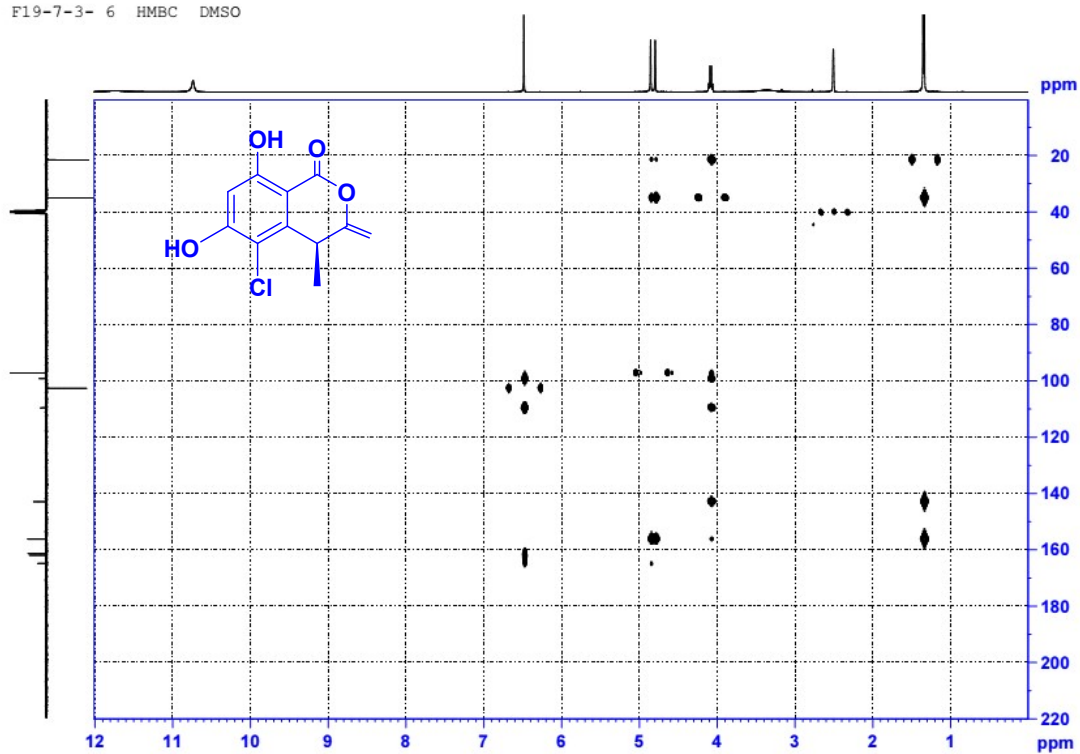

Figure 5-6. HMBC spectrum of compound 5 in  $\text{DMSO-}d_6$ .

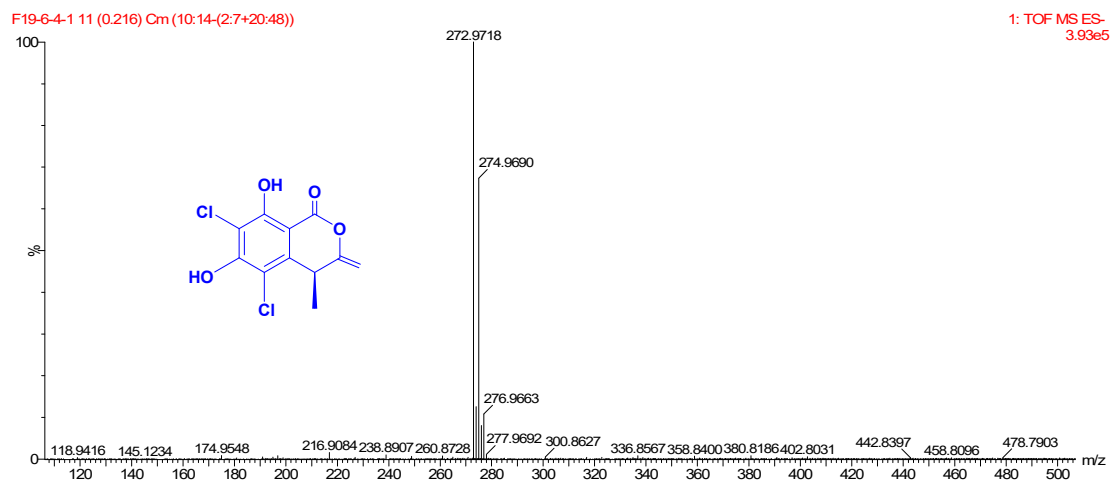

Figure 6-1. HRESIMS spectrum of compound 6.

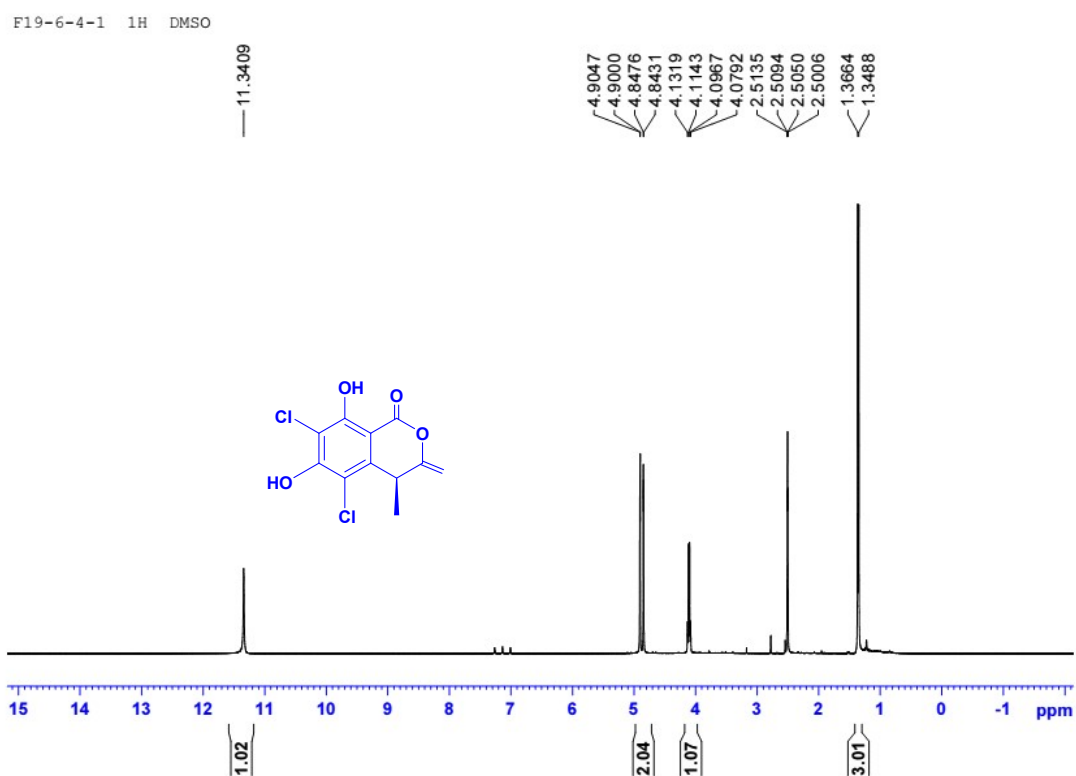

Figure 6-2.  $^1\text{H}$  NMR spectrum of compound 6 in  $\text{DMSO-}d_6$  (400 MHz).

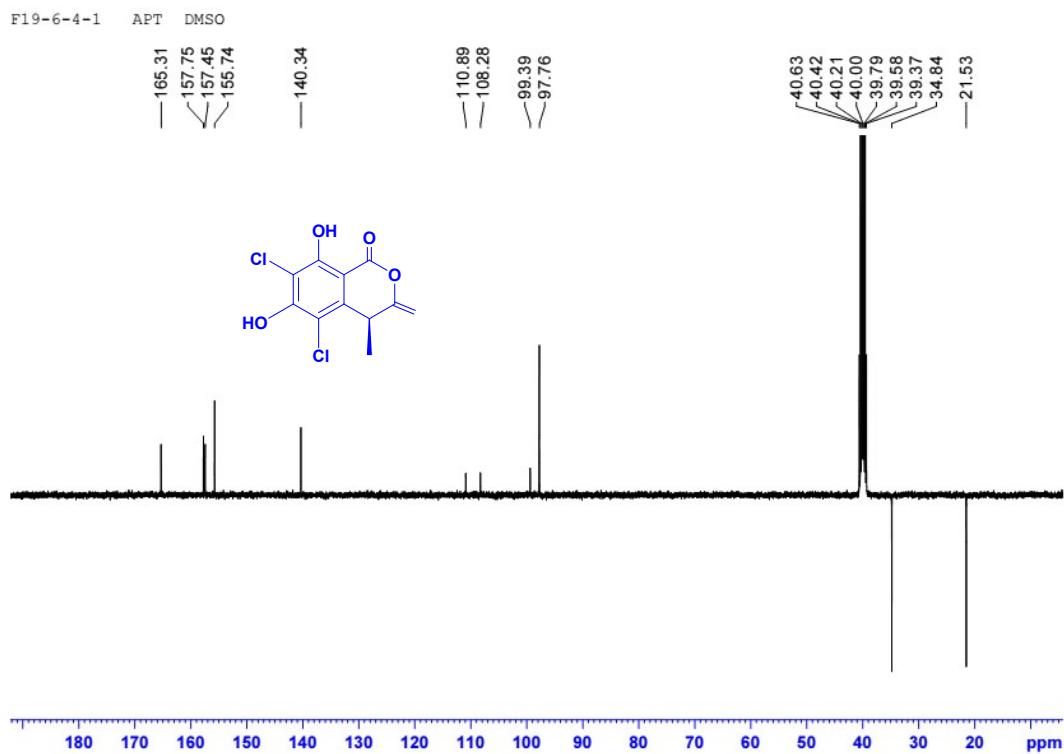

Figure 6-3. APT spectrum of compound 6 in DMSO- $d_6$  (100 MHz).

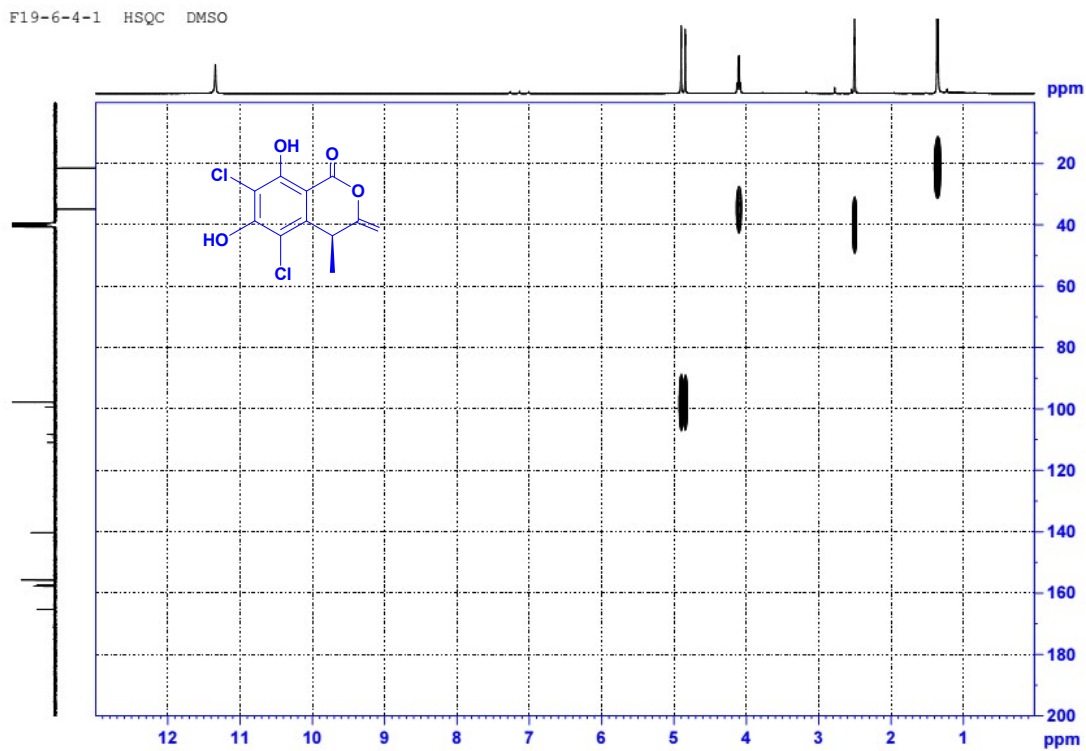

Figure 6-4. HSQC spectrum of compound 6 in DMSO- $d_6$ .

F19-6-4-1 COSY DMSO

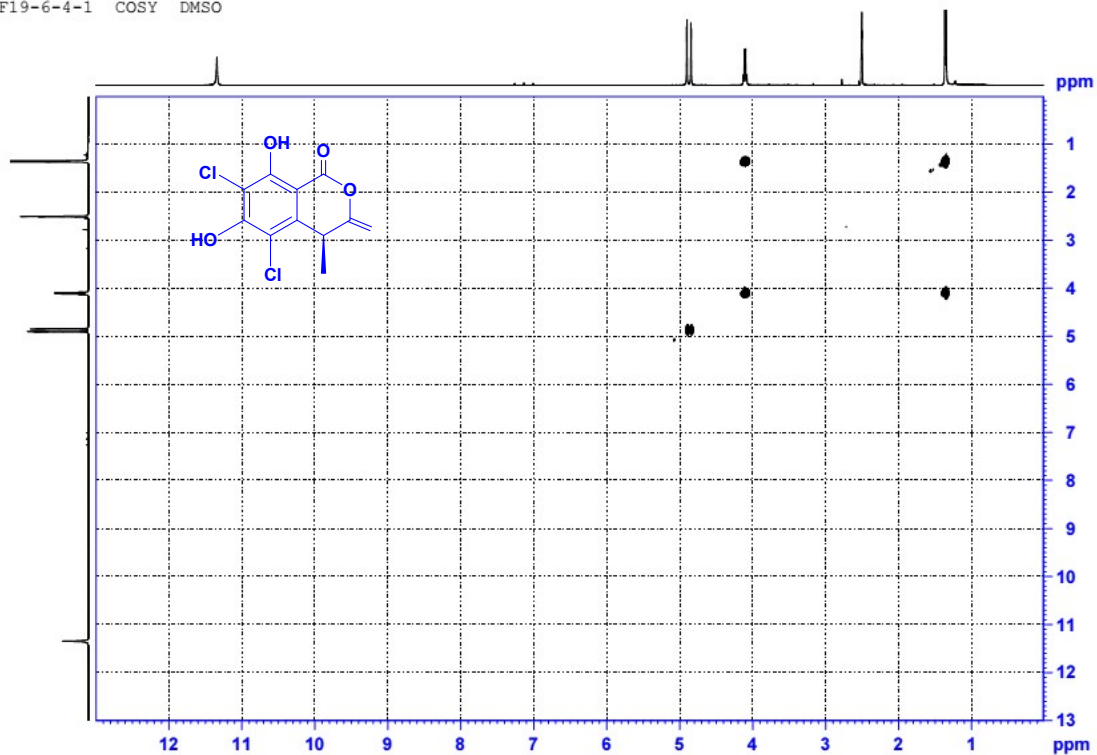

Figure 6-5.  $^1\text{H}$ - $^1\text{H}$  COSY spectrum of compound **6** in  $\text{DMSO-}d_6$ .

F19-6-4-1 HMBC DMSO

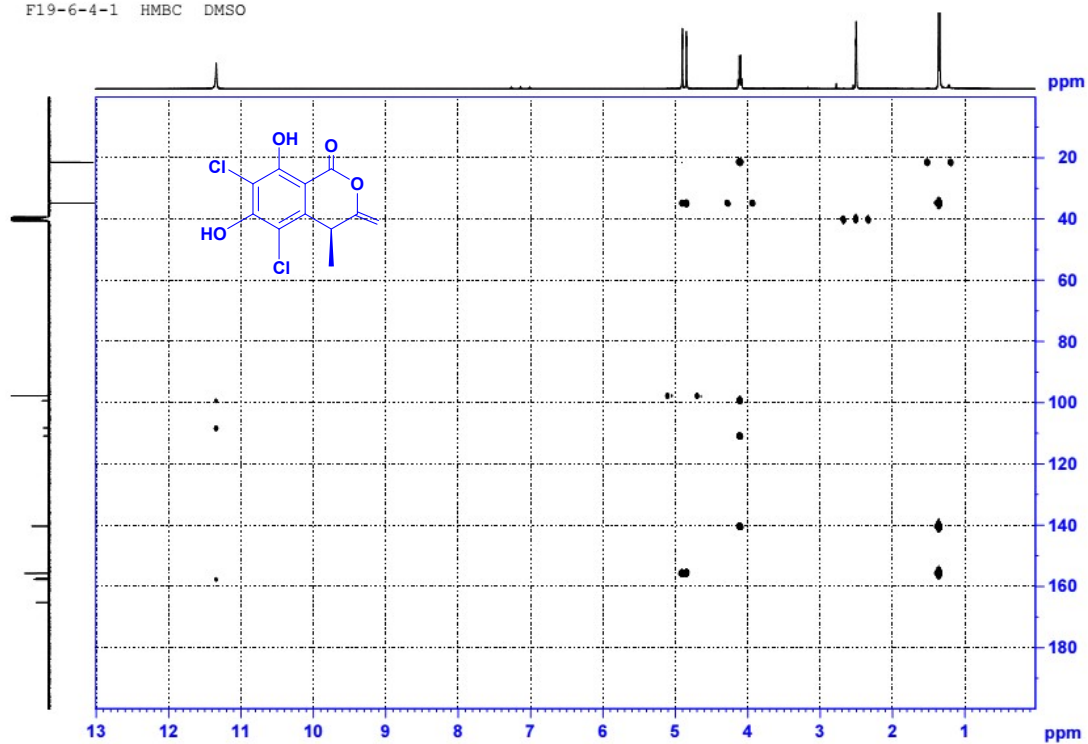

Figure 6-6. HMBC spectrum of compound **6** in  $\text{DMSO-}d_6$ .

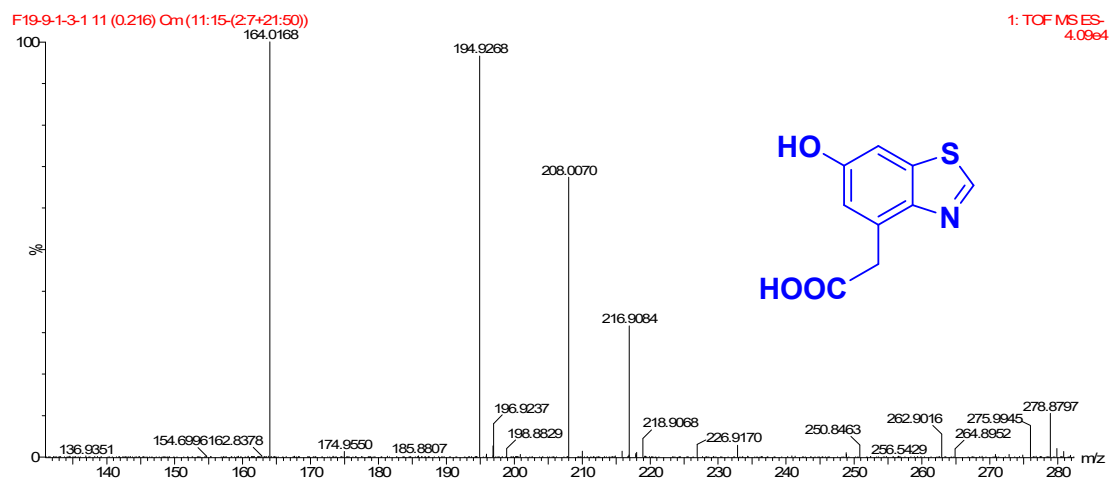

Figure 7-1. HRESIMS spectrum of compound 7.

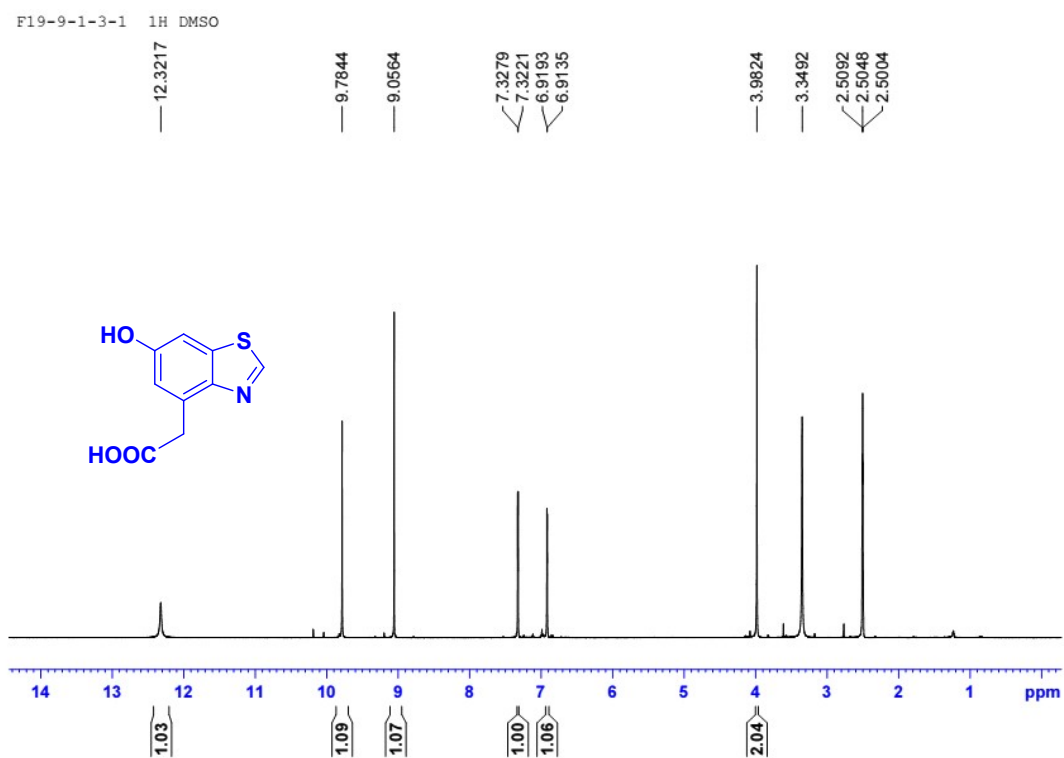

Figure 7-2.  $^1\text{H}$  NMR spectrum of compound 7 in  $\text{DMSO-}d_6$  (400 MHz).



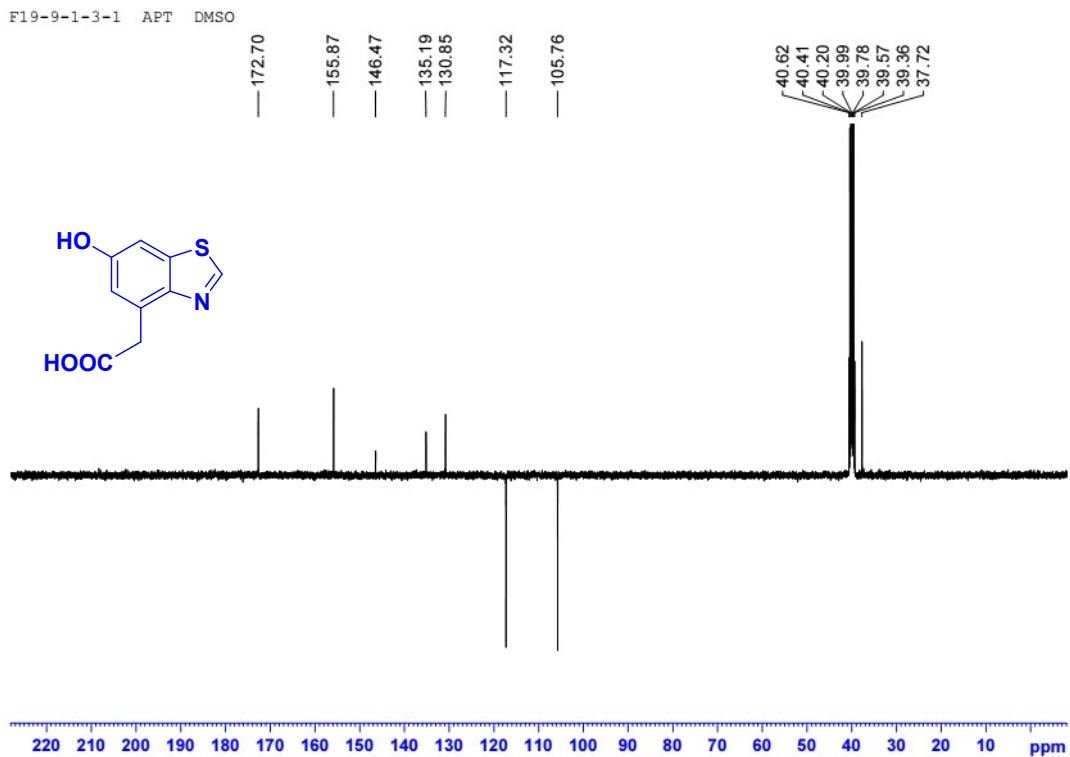

Figure 7-3. APT spectrum of compound 7 in DMSO- $d_6$  (100 MHz).

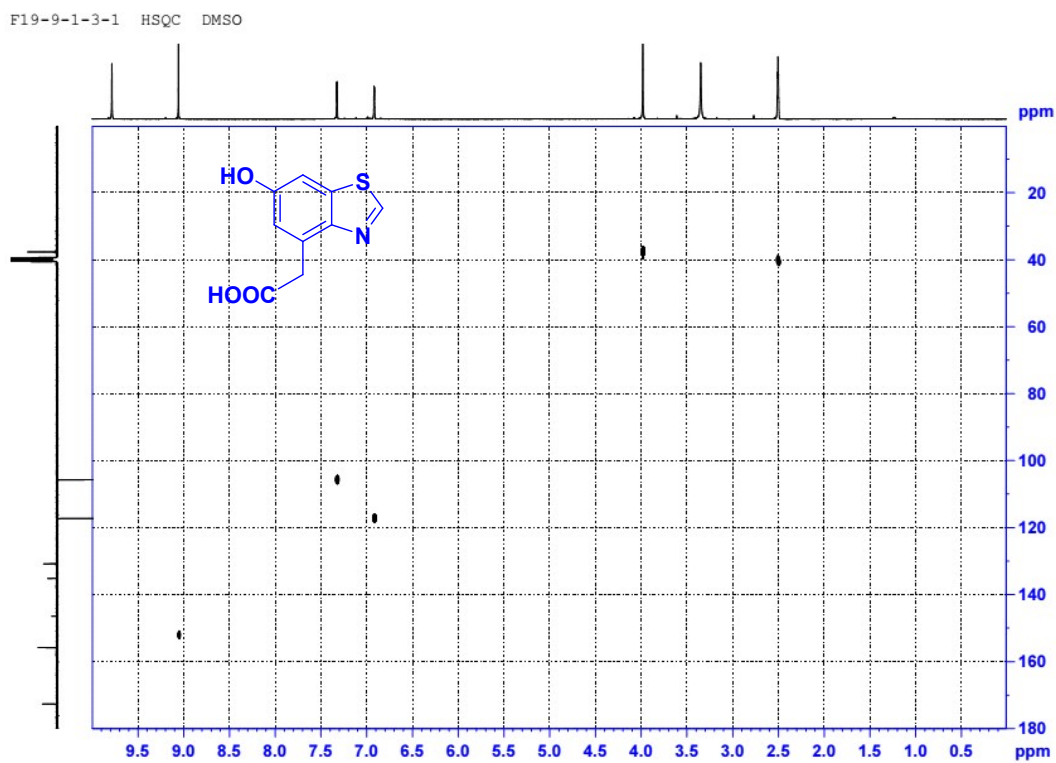

Figure 7-4. HSQC spectrum of compound 7 in DMSO- $d_6$ .

F19-9-1-3-1 COSY DMSO

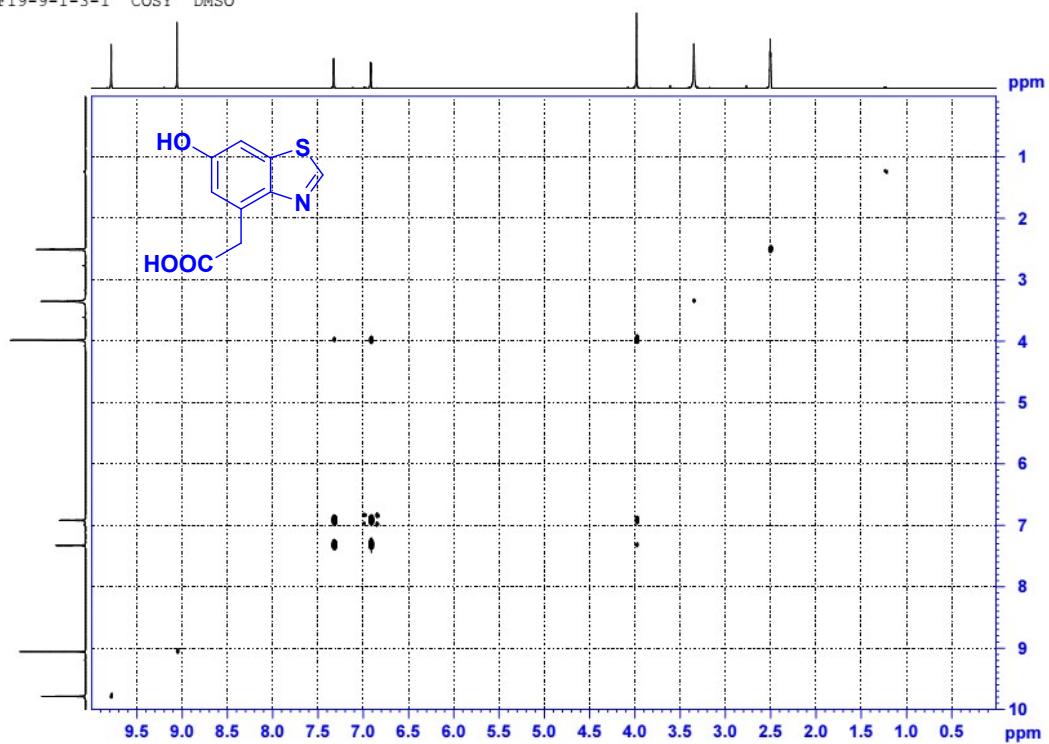

Figure 7-5. <sup>1</sup>H-<sup>1</sup>H COSY spectrum of compound 7 in DMSO-*d*<sub>6</sub>.

F19-9-1-3-1 HMBC DMSO

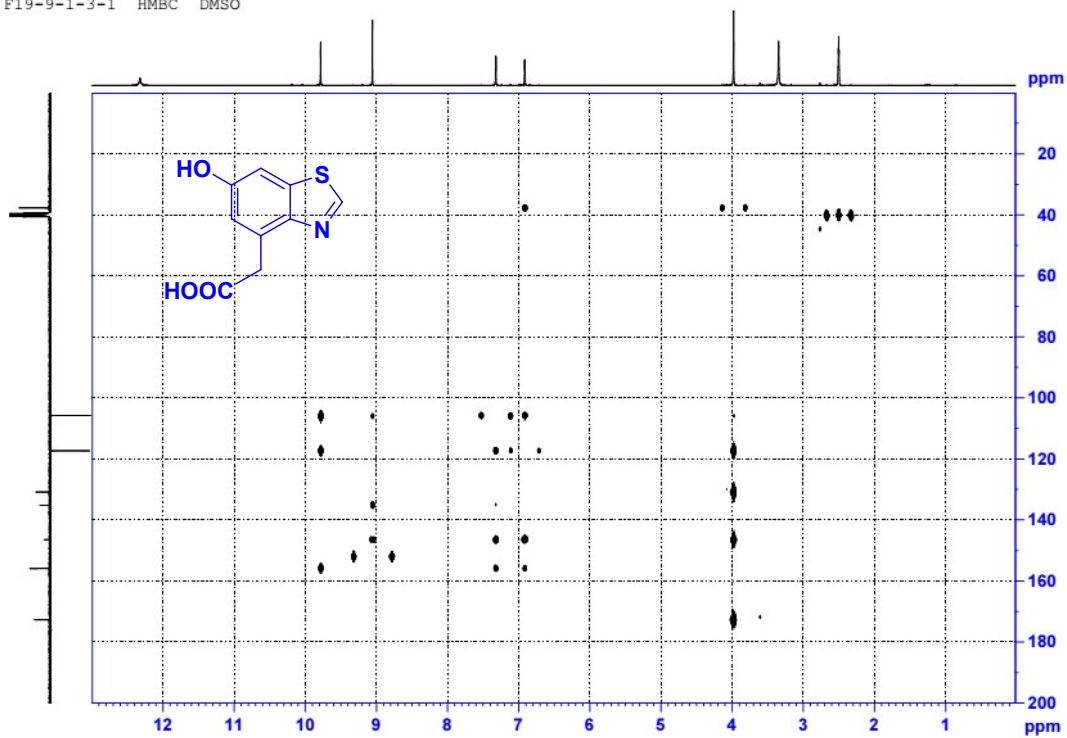

Figure 7-6. HMBC spectrum of compound 7 in DMSO-*d*<sub>6</sub>.

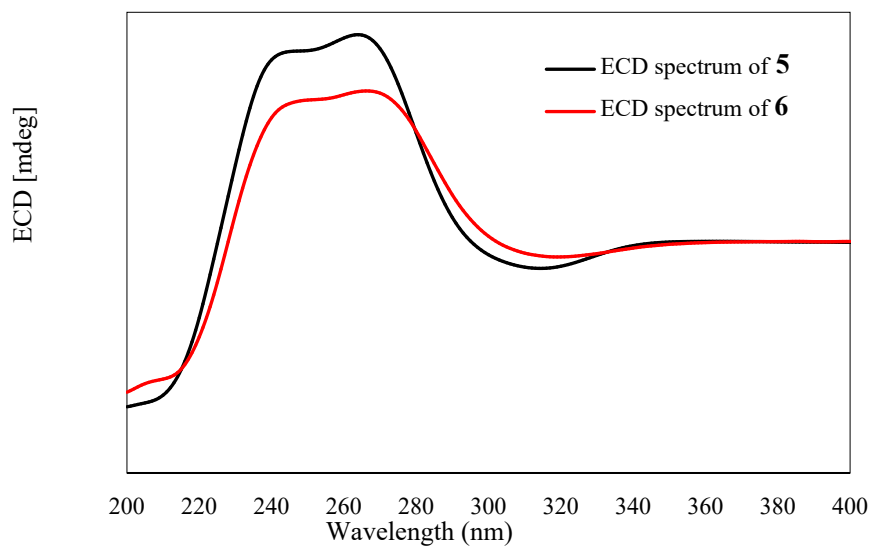

**Figure S8-1.** Experimental ECD spectra of **5** and **6** in MeOH

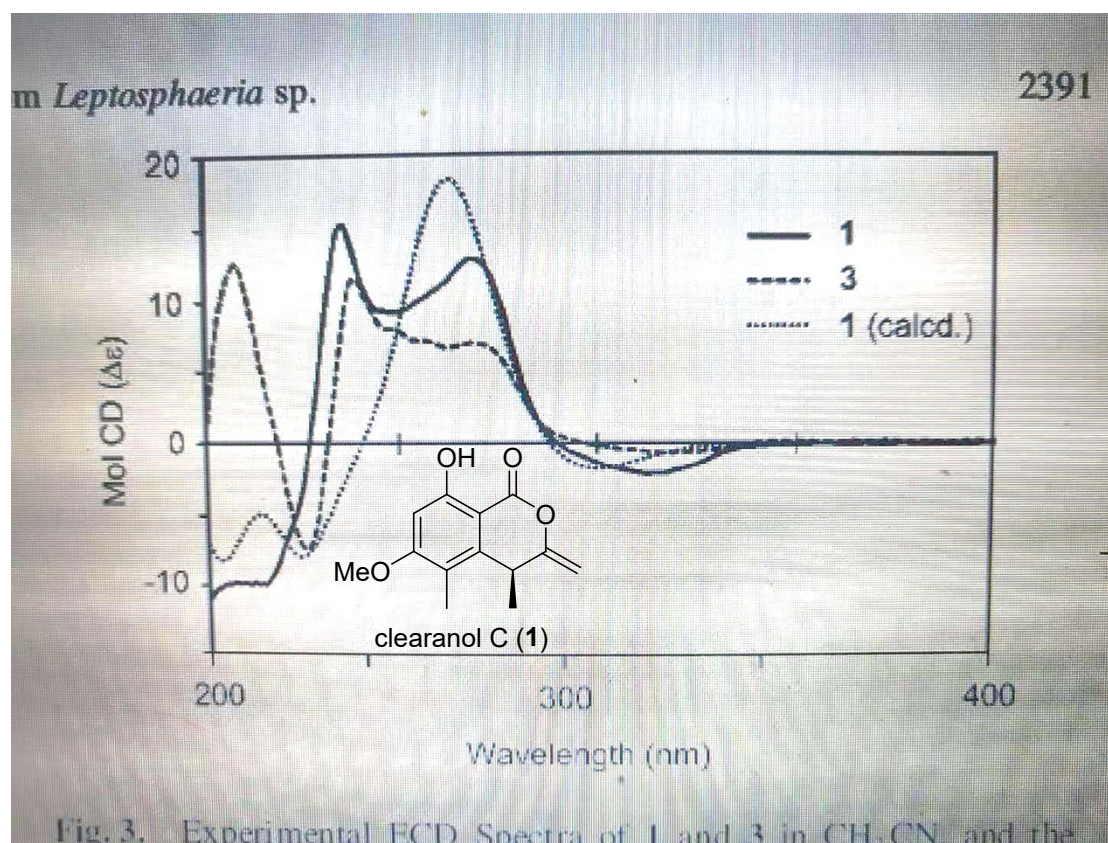

**Figure S8-2.** ECD spectrum of clearanol C (**1**)  
(Ref. 30: *Biosci. Biotech. Bioch.* 2011, 75, 2390–2393)
